# Supplementary material for: A retrospective study of consistency between immunohistochemistry and polymerase chain reaction of microsatellite instability in endometrial cancer
Source: PeerJ. 2023 Aug 28;11:e15920. doi: 10.7717/peerj.15920 (PMC10470453; doi:10.7717/peerj.15920)
Supplement: Supplemental Information 5 [file peerj-11-15920-s005.xlsx]

## Sheet: Sheet1
Record No.	Age	Gender	Specimen	p53Noneabnormal	FIGO (2009)	FIGO	GRADE	ICD-10	Histology	LVSI	MuscularNoneinvasion	Lymphadenectomy	LymphaticNonemetastasis	Chemotherapy	Radiotherapy	NACT	PersonalNonehistory	Family_history	MSI_anaylsis_NCI_panel	MSI_site	MSI_pattern	MSI_number	MMR/MSI_Consistency	MMR_status	Affected MMR proteins	MSI_promega_panel_analysis	NGS_MSI_analysis	Germline_Mutation	Molecular_classification	Protein_change_nucleotide_substitution	MLH1_promotor_methylation
202200001	51	Female	Curettage	No	Ia	I	G1	8380-3	EC	No	Superficial	Yes	No	No	No	No	No	No	MSI-H	2B+3D	B/D	5	Yes	dMMR	MLH1+PMS2	None	None	None	None	None	None
202200002	46	Female	Hysterectomy	No	Ia	I	G1	8380-3	EC	No	Superficial	Yes	No	Unknown	Unknown	Unknown	Unknown	Yes	MSS	0	None	0	Yes	pMMR	R	None	None	None	None	None	None
202200003	57	Female	Hysterectomy	No	Ia	I	G1	8380-3	EC	No	Superficial	Yes	No	Unknown	Unknown	Unknown	Unknown	No	MSS	0	None	0	Yes	pMMR	R	None	None	None	None	None	None
202200005	54	Female	Curettage	No	Ia	I	G1	8380-3	EC	No	Superficial	No	No	Unknown	Unknown	Unknown	Unknown	No	MSS	0	None	0	Yes	pMMR	R	None	None	None	None	None	None
202200006	48	Female	Curettage	No	Ib	I	G1	8380-3	EC	No	Deep	Yes	No	Unknown	Unknown	Unknown	Unknown	No	MSS	0	None	0	Yes	pMMR	R	None	None	None	None	None	None
202200008	41	Female	Curettage	Yes	Ia	I	G3	8323-3	MC	No	Superficial	Yes	No	Unknown	Unknown	Unknown	Unknown	No	MSS	0	None	0	Yes	pMMR	R	None	None	None	None	None	None
202200009	56	Female	Hysterectomy	No	Ia	I	G2	8380-3	EC	No	Superficial	No	No	Unknown	Unknown	Unknown	Unknown	No	MSS	0	None	0	Yes	pMMR	R	None	None	None	None	None	None
202200010	45	Female	Hysterectomy	Yes	Ib	I	G3	8380-3	EC	Yes	Deep	Yes	No	Unknown	Unknown	Unknown	No	No	MSI-H	1B+1D	B/D	2	Yes	dMMR	MSH2+MSH6	None	None	None	None	None	None
202200011	68	Female	Hysterectomy	No	IIIc	III	G3	8441-3	SC	Yes	Deep	Yes	Yes	No	Yes	Unknown	Unknown	Yes	MSS	0	None	0	Yes	pMMR	R	None	None	None	None	None	None
202200013	58	Female	Curettage	No	Ia	I	G1	8380-3	EC	No	Superficial	Yes	No	Unknown	Unknown	Unknown	No	No	MSI-H	1B+1D	B/D	2	Yes	dMMR	MLH1+PMS2	None	None	None	None	None	None
202200018	53	Female	Hysterectomy	No	Ia	I	G1	8380-3	EC	No	Superficial	No	No	Unknown	Unknown	Unknown	Unknown	No	MSS	0	None	0	Yes	pMMR	R	None	None	None	None	None	None
202200025	49	Female	Hysterectomy	No	Ia	I	G1	8380-3	EC	No	Superficial	Yes	No	Unknown	Unknown	Unknown	Unknown	No	MSS	0	None	0	Yes	pMMR	R	None	None	None	None	None	None
202200026	55	Female	Hysterectomy	No	Ia	I	G1	8380-3	EC	Yes	Superficial	Yes	No	Unknown	Unknown	Unknown	No	No	MSI-H	2B	B	2	Yes	dMMR	MLH1+PMS2	None	MSI-H	None	None	None	None
202200027	58	Female	Hysterectomy	No	IIIc	III	G1	8380-3	EC	Yes	Superficial	Yes	Yes	Yes	Yes	No	No	No	MSS	0	None	0	No	dMMR	MLH1+PMS2	MSS	MSS	No	MMRd	None	Yes
202200029	58	Female	Hysterectomy	Yes	Ia	I	G3	8323-3	MC	No	Superficial	Yes	No	Unknown	Unknown	Unknown	No	No	MSI-H	2B+2D	B/D	4	Yes	dMMR	MLH1+PMS2	None	None	None	None	None	None
202200030	41	Female	Hysterectomy	No	Ia	I	G2	8380-3	EC	No	Superficial	Yes	No	Unknown	Unknown	Unknown	No	Yes	MSI-H	1B+1D	B/D	2	Yes	dMMR	MLH1+PMS2	None	None	None	None	None	None
202200032	53	Female	Hysterectomy	No	Ia	I	G2	8380-3	EC	No	Superficial	Yes	No	Unknown	Unknown	Unknown	Unknown	No	MSS	0	None	0	Yes	pMMR	R	None	None	None	None	None	None
202200033	52	Female	Hysterectomy	No	Ia	I	G2	8380-3	EC	No	Superficial	Yes	No	Yes	Yes	Unknown	Unknown	No	MSS	0	None	0	Yes	pMMR	R	None	None	None	None	None	None
202200034	46	Female	Hysterectomy	Yes	Ia	I	G3	8323-3	MC	No	Superficial	Yes	No	Yes	No	Unknown	Unknown	No	MSS	0	None	0	Yes	pMMR	R	None	None	None	None	None	None
202200035	45	Female	Hysterectomy	No	IIIc	III	G3	8380-3	EC	Yes	Superficial	Yes	Yes	Yes	Yes	Unknown	No	No	MSI-H	2B	B	2	Yes	dMMR	MLH1+PMS2	None	None	None	MMRd	None	None
202200047	43	Female	Hysterectomy	No	Ia	I	G1	8380-3	EC	No	Superficial	Yes	No	Yes	No	Unknown	No	No	MSI-H	2B	B	2	Yes	dMMR	MSH2+MSH6	None	None	None	None	None	None
202200048	59	Female	Hysterectomy	No	Ia	I	G3	8380-3	EC	No	Superficial	Yes	No	Unknown	Unknown	Unknown	No	No	MSI-H	2B+2D	B/D	4	Yes	dMMR	MLH1+PMS2	None	None	None	None	None	None
202200049	50	Female	Curettage	No	Ia	I	G3	8380-3	EC	Yes	Deep	No	No	Unknown	Unknown	Unknown	No	No	MSI-H	2B	B	2	Yes	dMMR	MLH1+PMS2	None	None	None	None	None	None
202200050	57	Female	Curettage	Yes	Ia	I	G1	8380-3	EC	No	Superficial	Yes	No	Unknown	Unknown	No	No	No	MSI-L	1B	B	1	No	dMMR	MSH6	MSS	MSI-L	MSH6	MMRd-p53abn	None	None
202200051	67	Female	Hysterectomy	No	Ia	I	G1	8380-3	EC	No	Superficial	Yes	No	Unknown	Unknown	Unknown	Unknown	No	MSS	0	None	0	Yes	pMMR	R	None	None	None	None	None	None
202200055	53	Female	Curettage	No	Ia	I	G1	8380-3	EC	No	Superficial	Yes	No	Unknown	Unknown	Unknown	No	No	MSI-H	2B	B	2	Yes	dMMR	MSH6	None	None	None	None	None	None
202200056	33	Female	Hysterectomy	No	Ia	I	G1	8380-3	EC	No	Superficial	Yes	No	Unknown	Unknown	Unknown	Unknown	No	MSS	0	None	0	Yes	pMMR	R	None	None	None	None	None	None
202200057	50	Female	Hysterectomy	No	II	II	G1	8380-3	EC	No	Superficial	No	No	Unknown	Unknown	Unknown	Unknown	No	MSS	0	None	0	Yes	pMMR	R	None	None	None	None	None	None
202200058	40	Female	Hysterectomy	No	Ia	I	G1	8380-3	EC	No	Superficial	Yes	No	Unknown	Unknown	Unknown	No	Yes	MSI-H	2B	B	2	Yes	dMMR	MLH1+PMS2	None	None	None	None	None	None
202200059	51	Female	Curettage	No	Ia	I	G2	8380-3	EC	No	Superficial	Yes	No	Unknown	Unknown	Unknown	No	No	MSI-H	2B+3D	B/D	5	Yes	dMMR	PMS2	None	None	None	None	None	None
202200060	52	Female	Hysterectomy	No	IIIa	III	G3	8380-3	EC	Yes	Deep	Yes	No	Yes	No	Unknown	No	No	MSI-H	2B+2D	B/D	4	Yes	dMMR	MLH1+PMS2	None	None	None	MMRd	None	None
202200061	57	Female	Curettage	No	Ib	I	G1	8380-3	EC	No	Deep	Yes	No	Unknown	Unknown	Unknown	Unknown	No	MSS	0	None	0	Yes	pMMR	R	None	None	None	None	None	None
202200062	54	Female	Hysterectomy	Yes	IIIc	III	G3	8441-3	SC	Yes	Deep	Yes	Yes	Yes	No	Unknown	Unknown	No	MSS	0	None	0	Yes	pMMR	R	None	None	None	p53-abn	None	None
202200063	52	Female	Hysterectomy	No	Ia	I	G1	8380-3	EC	No	Superficial	Yes	No	Unknown	Unknown	Unknown	No	No	MSI-H	2B	B	2	Yes	dMMR	MLH1+PMS2	None	None	None	None	None	None
202200065	68	Female	Curettage	No	Ia	I	G1	8380-3	EC	No	Superficial	Yes	No	Unknown	Unknown	Unknown	Unknown	No	MSS	0	None	0	Yes	pMMR	R	None	None	None	POLEmut	V411L(G>T)	None
202200066	69	Female	Hysterectomy	No	Ib	I	G1	8380-3	EC	No	Deep	Yes	No	No	Yes	Unknown	Unknown	No	MSS	0	None	0	Yes	pMMR	R	None	None	None	NSMP	None	None
202200067	81	Female	Curettage	No	Ia	I	G3	8310-3	CC	Yes	Superficial	No	No	Yes	Yes	Unknown	Unknown	No	MSS	0	None	0	Yes	pMMR	R	None	None	None	NSMP	None	None
202200068	57	Female	Hysterectomy	No	IIIc	III	G2	8380-3	EC	Yes	Deep	Yes	Yes	Yes	Yes	Unknown	Unknown	No	MSS	0	None	0	Yes	pMMR	R	None	None	None	NSMP	None	None
202200069	52	Female	Curettage	No	Ia	I	G2	8380-3	EC	No	Superficial	No	No	No	Yes	Unknown	No	No	MSI-H	1B+1D	B/D	2	Yes	dMMR	MLH1+PMS2	None	None	None	MMRd	None	None
202200072	57	Female	Hysterectomy	No	Ia	I	G2	8380-3	EC	No	Superficial	Yes	No	Unknown	Unknown	Unknown	No	No	MSI-H	2B+2D	B/D	4	Yes	dMMR	PMS2	None	None	None	MMRd	None	None
202200073	52	Female	Curettage	No	Ia	I	G3	8380-3	EC	No	Superficial	Yes	No	Unknown	Unknown	Unknown	Unknown	No	MSS	0	None	0	Yes	pMMR	R	None	None	None	POLEmut	PMS286R(C>G)	None
202200074	49	Female	Curettage	No	Ia	I	G1	8380-3	EC	No	Superficial	Yes	No	Unknown	Unknown	Unknown	Unknown	No	MSS	0	None	0	Yes	pMMR	R	None	None	None	NSMP	None	None
202200075	50	Female	Hysterectomy	No	Ia	I	G2	8380-3	EC	No	Superficial	Yes	No	Unknown	Unknown	Unknown	Unknown	No	MSS	0	None	0	Yes	pMMR	R	None	None	None	NSMP	None	None
202200076	55	Female	Hysterectomy	No	Ib	I	G3	8380-3	EC	No	Deep	Yes	No	Unknown	Unknown	Unknown	No	No	MSI-H	2B+2D	B/D	4	Yes	dMMR	MLH1+PMS2	None	None	None	MMRd	None	None
202200077	44	Female	Hysterectomy	No	IIIb	III	G3	8380-3	EC	Yes	Deep	Yes	No	Yes	Yes	Unknown	Unknown	No	MSS	0	None	0	Yes	pMMR	R	None	None	None	POLEmut	S297F(C>T)	None
202200078	47	Female	Curettage	No	Ia	I	G1	8380-3	EC	No	Superficial	Yes	No	Yes	No	Unknown	Unknown	No	MSS	0	None	0	Yes	pMMR	R	None	None	None	NSMP	None	None
202200079	41	Female	Curettage	No	IIIa	III	G1	8380-3	EC	No	Superficial	Yes	No	Yes	Yes	Unknown	Unknown	No	MSS	0	None	0	Yes	pMMR	R	None	None	None	NSMP	None	None
202200085	44	Female	Curettage	No	Ia	I	G2	8380-3	EC	Yes	Superficial	Yes	No	Yes	Yes	Unknown	Unknown	No	MSS	0	None	0	Yes	pMMR	R	None	None	None	NSMP	None	None
202200086	60	Female	Hysterectomy	No	IIIc	III	G2	8380-3	EC	Yes	Deep	Yes	Yes	Yes	Yes	Unknown	Unknown	No	MSS	0	None	0	Yes	pMMR	R	None	None	None	NSMP	None	None
202200087	36	Female	Hysterectomy	No	IIIc	III	G1	8380-3	EC	Yes	Deep	Yes	Yes	Yes	Yes	Unknown	Unknown	No	MSS	0	None	0	Yes	pMMR	R	None	MSS	None	None	None	None
202200088	50	Female	Hysterectomy	No	IIIc	III	G3	8323-3	MC	Yes	Deep	Yes	Yes	Yes	Yes	Unknown	Unknown	No	MSS	0	None	0	Yes	pMMR	R	None	None	None	NSMP	None	None
202200089	46	Female	Curettage	No	Ib	I	G3	8380-3	EC	No	Deep	Yes	No	Yes	Yes	Unknown	Unknown	No	MSS	0	None	0	Yes	pMMR	R	None	None	None	NSMP	None	None
202200090	52	Female	Hysterectomy	No	IVb	IV	G3	8380-3	EC	Yes	Superficial	Yes	No	Yes	Yes	Unknown	No	No	MSI-H	2B	B	2	Yes	dMMR	MLH1+PMS2	None	None	None	MMRd	None	None
202200091	82	Female	Hysterectomy	No	Ia	I	G1	8380-3	EC	No	Superficial	No	No	Unknown	Unknown	Unknown	No	No	MSI-H	2B+3D	B	5	Yes	dMMR	PMS2	None	None	None	MMRd	None	None
202200092	44	Female	Hysterectomy	No	IIIa	III	G1	8380-3	EC	No	Superficial	Yes	No	Yes	Yes	Unknown	Unknown	Yes	MSS	0	None	0	Yes	pMMR	R	None	None	None	NSMP	None	None
202200093	50	Female	Hysterectomy	No	Ia	I	G2	8380-3	EC	No	Superficial	Yes	No	Unknown	Unknown	Unknown	Unknown	No	MSS	0	None	0	Yes	pMMR	R	None	None	None	NSMP	None	None
202200094	49	Female	Hysterectomy	No	Ia	I	G2	8380-3	EC	No	Superficial	Yes	No	Unknown	Unknown	Unknown	Unknown	No	MSS	0	None	0	Yes	pMMR	R	None	None	None	NSMP	None	None
202200095	43	Female	Hysterectomy	No	Ia	I	G3	8380-3	EC	Yes	Superficial	Yes	No	Yes	Yes	Unknown	Unknown	No	MSS	0	None	0	Yes	pMMR	R	None	None	None	NSMP	None	None
202200096	59	Female	Curettage	No	Ia	I	G2	8380-3	EC	No	Superficial	No	No	Yes	Yes	Unknown	No	No	MSI-H	2B	B	2	Yes	dMMR	MLH1+PMS2	None	None	None	MMRd	None	None
202200097	54	Female	Hysterectomy	No	IIIc	III	G1	8380-3	EC	Yes	Superficial	Yes	Yes	Yes	Yes	Unknown	Unknown	No	MSS	0	None	0	Yes	pMMR	R	None	None	None	NSMP	None	None
202200098	55	Female	Hysterectomy	No	Ib	I	G2	8380-3	EC	No	Deep	Yes	No	Unknown	Unknown	Unknown	Unknown	No	MSS	0	None	0	Yes	pMMR	R	None	None	None	NSMP	None	None
202200099	58	Female	Hysterectomy	No	Ib	I	G3	8380-3	EC	Yes	Deep	Yes	No	No	Yes	Unknown	No	No	MSI-H	2B	B	2	Yes	dMMR	MSH6	None	None	None	MMRd	None	None
202200100	67	Female	Hysterectomy	Yes	Ia	I	G3	8323-3	MC	Yes	Superficial	Yes	No	Yes	No	Unknown	Unknown	No	MSS	0	None	0	Yes	pMMR	R	None	None	None	p53-abn	None	None
202200101	54	Female	Curettage	No	IIIc	III	G1	8380-3	EC	No	Superficial	Yes	Yes	Yes	Yes	Unknown	Unknown	No	MSS	0	None	0	Yes	pMMR	R	None	None	None	NSMP	None	None
202200102	60	Female	Hysterectomy	No	Ib	I	G2	8380-3	EC	No	Deep	Yes	No	Yes	Yes	Unknown	Unknown	Yes	MSS	0	None	0	Yes	pMMR	R	None	None	None	NSMP	None	None
202200103	53	Female	Hysterectomy	No	Ia	I	G1	8380-3	EC	No	Superficial	Yes	No	Unknown	Unknown	Unknown	Unknown	No	MSS	0	None	0	Yes	pMMR	R	None	None	None	POLEmut	PMS286R(C>G)	None
202200104	52	Female	Curettage	No	Ib	I	G1	8380-3	EC	No	Superficial	Yes	No	Yes	Yes	Unknown	No	Yes	MSI-H	1B+1D	B/D	2	Yes	dMMR	MLH1+PMS2	None	None	None	MMRd	None	None
202200107	55	Female	Hysterectomy	Yes	Ia	I	G3	8323-3	MC	No	Superficial	Yes	No	Yes	Yes	Unknown	No	No	MSI-H	2B	B	2	Yes	dMMR	MLH1+PMS2	None	None	None	MMRd	None	None
202200108	67	Female	Hysterectomy	No	Ia	I	G1	8380-3	EC	No	Superficial	Yes	No	Unknown	Unknown	Unknown	Unknown	No	MSS	0	None	0	Yes	pMMR	R	None	MSS	None	NSMP	None	None
202200109	59	Female	Hysterectomy	No	IIIa	III	G1	8380-3	EC	Yes	Superficial	Yes	No	Yes	Yes	Unknown	Unknown	No	MSS	0	None	0	Yes	pMMR	R	None	None	None	NSMP	None	None
202200110	53	Female	Hysterectomy	Yes	IVb	IV	G3	8441-3	SC	Yes	Deep	Yes	No	Yes	Yes	Unknown	Unknown	No	MSS	0	None	0	Yes	pMMR	R	None	None	None	p53-abn	None	None
202200115	44	Female	Curettage	No	Ia	I	G3	8380-3	EC	No	Superficial	Yes	No	Yes	Yes	Unknown	Unknown	No	MSS	0	None	0	Yes	pMMR	R	None	None	None	NSMP	None	None
202200116	46	Female	Curettage	No	Ia	I	G1	8380-3	EC	No	Superficial	No	No	Unknown	Unknown	No	No	No	MSS	0	None	0	Yes	pMMR	R	None	MSS	None	NSMP	None	None
202200118	51	Female	Curettage	No	Ia	I	G1	8380-3	EC	No	Superficial	Yes	No	Unknown	Unknown	Unknown	Unknown	No	MSS	0	None	0	Yes	pMMR	R	None	None	None	NSMP	None	None
202200119	65	Female	Hysterectomy	No	Ia	I	G2	8380-3	EC	Yes	Superficial	Yes	No	Yes	Yes	Unknown	Unknown	No	MSS	0	None	0	Yes	pMMR	R	None	None	None	NSMP	None	None
202200120	65	Female	Hysterectomy	No	Ia	I	G1	8380-3	EC	No	Superficial	Yes	No	Unknown	Unknown	Unknown	No	No	MSI-H	1B+1D	B/D	2	Yes	dMMR	MLH1+PMS2	None	None	None	MMRd	None	None
202200125	58	Female	Hysterectomy	No	Ia	I	G3	8380-3	EC	No	Superficial	Yes	No	Unknown	Unknown	Unknown	No	No	MSI-H	2B+3D	B/D	5	Yes	dMMR	MSH2+MSH6	None	None	None	MMRd	None	None
202200126	47	Female	Hysterectomy	No	Ia	I	G1	8380-3	EC	No	Superficial	Yes	No	Unknown	Unknown	Unknown	Unknown	No	MSS	0	None	0	Yes	pMMR	R	None	None	None	NSMP	None	None
202200128	57	Female	Hysterectomy	No	Ia	I	G1	8380-3	EC	No	Superficial	Yes	No	Unknown	Unknown	Unknown	Unknown	No	MSS	0	None	0	Yes	pMMR	R	None	None	None	NSMP	None	None
202200129	52	Female	Hysterectomy	No	Ia	I	G1	8380-3	EC	No	Superficial	Yes	No	Unknown	Unknown	Unknown	Unknown	No	MSS	0	None	0	Yes	pMMR	R	None	None	None	NSMP	None	None
202200130	58	Female	Hysterectomy	No	Ib	I	G3	8380-3	EC	No	Deep	Yes	No	No	Yes	Unknown	No	No	MSI-H	1B+1D	B/D	2	Yes	dMMR	MLH1+PMS2	None	None	None	MMRd	None	None
202200131	68	Female	Hysterectomy	No	Ib	I	G1	8380-3	EC	Yes	Deep	Yes	No	Yes	No	Unknown	No	No	MSI-H	2B	B	2	Yes	dMMR	MLH1+PMS2	None	None	None	MMRd	None	None
202200133	50	Female	Hysterectomy	No	Ia	I	G1	8380-3	EC	Yes	Superficial	Yes	No	Unknown	Unknown	Unknown	Unknown	No	MSS	0	None	0	Yes	pMMR	R	None	None	None	NSMP	None	None
202200134	50	Female	Hysterectomy	No	Ib	I	G2	8380-3	EC	No	Deep	Yes	No	Yes	Yes	Unknown	Unknown	No	MSS	0	None	0	Yes	pMMR	R	None	None	None	NSMP	None	None
202200135	76	Female	Hysterectomy	No	Ib	I	G3	8380-3	EC	Yes	Deep	Yes	No	Yes	Yes	Unknown	Unknown	No	MSS	0	None	0	Yes	pMMR	R	None	None	None	NSMP	None	None
202200136	45	Female	Curettage	No	Ia	I	G3	8323-3	MC	No	Superficial	Yes	No	Yes	Yes	Unknown	No	Yes	MSI-H	2B+2D	B/D	4	Yes	dMMR	MLH1+PMS2	None	None	None	MMRd	None	None
202200137	39	Female	Curettage	No	Ib	I	G2	8380-3	EC	No	Deep	Yes	No	Yes	Yes	Unknown	Unknown	No	MSS	0	None	0	Yes	pMMR	R	None	None	None	NSMP	None	None
202200141	65	Female	Hysterectomy	No	Ib	I	G1	8380-3	EC	Yes	Deep	Yes	No	Yes	Yes	Unknown	Unknown	No	MSS	0	None	0	Yes	pMMR	R	None	None	None	NSMP	None	None
202200142	53	Female	Hysterectomy	No	II	II	G1	8380-3	EC	No	Deep	Yes	No	Yes	Yes	Unknown	No	No	MSI-H	2B	B	2	Yes	dMMR	MSH2+MSH6	None	None	None	MMRd	None	None
202200143	60	Female	Hysterectomy	Yes	Ia	I	G3	8380-3	EC	Yes	Superficial	Yes	No	Yes	Yes	Unknown	Unknown	No	MSS	0	None	0	Yes	pMMR	R	None	None	None	p53-abn	None	None
202200144	57	Female	Curettage	No	II	II	G1	8380-3	EC	No	Superficial	Yes	No	Yes	Yes	Unknown	Unknown	Yes	MSS	0	None	0	Yes	pMMR	R	None	None	None	NSMP	None	None
202200145	46	Female	Hysterectomy	No	II	II	G3	8380-3	EC	Yes	Deep	Yes	No	Yes	Yes	Unknown	No	No	MSI-H	1B+1D	B/D	2	Yes	dMMR	MLH1+PMS2	None	None	None	MMRd	None	None
202200146	58	Female	Curettage	No	Ia	I	G1	8380-3	EC	No	Superficial	Yes	No	Unknown	Unknown	Unknown	Unknown	No	MSS	0	None	0	Yes	pMMR	R	None	None	None	NSMP	None	None
202200147	61	Female	Hysterectomy	No	II	II	G3	8380-3	EC	No	Deep	Yes	No	Yes	No	Unknown	Unknown	No	MSS	0	None	0	Yes	pMMR	R	None	None	None	NSMP	None	None
202200151	58	Female	Curettage	No	Ia	I	G1	8380-3	EC	No	Superficial	Yes	No	Unknown	Unknown	Unknown	Unknown	No	MSS	0	None	0	Yes	pMMR	R	None	None	None	NSMP	None	None
202200152	35	Female	Hysterectomy	No	Ia	I	G3	8380-3	EC	No	Superficial	Yes	No	Unknown	Unknown	Unknown	Unknown	No	MSS	0	None	0	Yes	pMMR	R	None	None	None	NSMP	None	None
202200153	56	Female	Hysterectomy	Yes	II	II	G3	8380-3	EC	Yes	Superficial	Yes	No	Yes	Yes	No	No	No	MSI-L	1B	B	1	No	dMMR	MSH6	MSI-L(Mono27)	MSI-H	MSH6	MMRd-p53abn	None	None
202200154	57	Female	Hysterectomy	No	IVb	IV	G3	8323-3	MC	Yes	Deep	Yes	Yes	Yes	Yes	Unknown	Unknown	No	MSS	0	None	0	Yes	pMMR	R	None	None	None	NSMP	None	None
202200155	53	Female	Hysterectomy	No	IIIa	III	G1	8380-3	EC	No	Superficial	Yes	No	Yes	Yes	Unknown	Unknown	No	MSS	0	None	0	Yes	pMMR	R	None	None	None	NSMP	None	None
202200156	57	Female	Curettage	Yes	Ia	I	G3	8323-3	MC	No	Superficial	Yes	No	Yes	Yes	Unknown	Unknown	No	MSS	0	None	0	Yes	pMMR	R	None	None	None	p53-abn	None	None
202200160	71	Female	Hysterectomy	No	IIIa	III	G1	8380-3	EC	No	Deep	Yes	No	Unknown	Unknown	Unknown	Unknown	No	MSS	0	None	0	Yes	pMMR	R	None	None	None	NSMP	None	None
202200161	50	Female	Hysterectomy	No	II	II	G3	8380-3	EC	No	Deep	Yes	No	Yes	Yes	Unknown	No	No	MSI-H	2B+3D	B/D	5	Yes	dMMR	MSH2+MSH6	None	None	None	MMRd	None	None
202200162	60	Female	Curettage	No	Ia	I	G1	8380-3	EC	No	Superficial	Yes	No	Unknown	Unknown	Unknown	Unknown	No	MSS	0	None	0	Yes	pMMR	R	None	None	None	NSMP	None	None
202200163	52	Female	Hysterectomy	No	IIIc	III	G3	8380-3	EC	Yes	Deep	Yes	Yes	Yes	Yes	Unknown	Unknown	No	MSS	0	None	0	Yes	pMMR	R	None	None	None	NSMP	None	None
202200164	53	Female	Hysterectomy	No	Ia	I	G1	8380-3	EC	No	Superficial	Yes	No	Unknown	Unknown	Unknown	No	No	MSI-H	2B+2D	B/D	4	Yes	dMMR	MSH2+MSH6	None	None	None	MMRd	None	None
202200166	46	Female	Curettage	No	Ia	I	G1	8380-3	EC	No	Superficial	Yes	No	Unknown	Unknown	Unknown	No	No	MSI-H	2B+3D	B/D	5	Yes	dMMR	MSH2+MSH6	None	None	None	MMRd	None	None
202200167	54	Female	Curettage	No	Ia	I	G3	8380-3	EC	No	Superficial	Yes	No	Yes	No	Unknown	No	No	MSI-H	2B+1D	B/D	3	Yes	dMMR	MSH2+MSH6	None	None	None	MMRd	None	None
202200169	54	Female	Curettage	No	Ia	I	G1	8380-3	EC	No	Superficial	Yes	No	Unknown	Unknown	Unknown	Unknown	No	MSS	0	None	0	Yes	pMMR	R	None	None	None	NSMP	None	None
202200171	80	Female	Hysterectomy	No	Ib	I	G1	8380-3	EC	No	Deep	No	No	Yes	Yes	Unknown	Unknown	No	MSS	0	None	0	Yes	pMMR	R	None	None	None	NSMP	None	None
202200172	53	Female	Hysterectomy	No	IIIb	III	G2	8380-3	EC	No	Deep	Yes	No	Yes	Yes	Unknown	Unknown	No	MSS	0	None	0	Yes	pMMR	R	None	None	None	NSMP	None	None
202200175	57	Female	Curettage	No	Ib	I	G1	8380-3	EC	Yes	Superficial	Yes	No	Yes	Yes	Unknown	Unknown	No	MSS	0	None	0	Yes	pMMR	R	None	None	None	POLEmut	S297F(C>T)	None
202200176	48	Female	Hysterectomy	Yes	IVb	IV	G3	8323-3	MC	No	Deep	Yes	Yes	Yes	Yes	Unknown	Unknown	No	MSS	0	None	0	Yes	pMMR	R	None	None	None	p53-abn	None	None
202200178	36	Female	Hysterectomy	No	IIIc	III	G2	8380-3	EC	Yes	Deep	Yes	Yes	Yes	Yes	Unknown	Unknown	No	MSS	0	None	0	Yes	pMMR	R	None	None	None	NSMP	None	None
202200179	73	Female	Hysterectomy	No	Ib	I	G1	8380-3	EC	Yes	Deep	Yes	No	Yes	Yes	Unknown	Unknown	No	MSS	0	None	0	Yes	pMMR	R	None	None	None	NSMP	None	None
202200181	68	Female	Hysterectomy	No	IIIa	III	G1	8380-3	EC	Yes	Superficial	Yes	No	Yes	Yes	Unknown	Unknown	No	MSS	0	None	0	Yes	pMMR	R	None	None	None	NSMP	None	None
202200182	35	Female	Hysterectomy	No	IIIc	III	G3	8380-3	EC	No	Superficial	Yes	No	Yes	Yes	Unknown	Unknown	No	MSS	0	None	0	Yes	pMMR	R	None	None	None	NSMP	None	None
202200183	46	Female	Hysterectomy	No	Ia	I	G1	8380-3	EC	No	Superficial	Yes	No	No	Yes	Unknown	Unknown	No	MSS	0	None	0	Yes	pMMR	R	None	None	None	POLEmut	A456P(G>C)	None
202200185	51	Female	Curettage	No	Ia	I	G1	8380-3	EC	No	Superficial	Yes	No	Unknown	Unknown	Unknown	Unknown	No	MSS	0	None	0	Yes	pMMR	R	None	None	None	POLEmut	PMS286R(C>G)	None
202200186	56	Female	Hysterectomy	No	Ia	I	G3	8980-3	CS	No	Superficial	Yes	No	Yes	Yes	Unknown	Unknown	No	MSS	0	None	0	Yes	pMMR	R	None	None	None	NSMP	None	None
202200187	47	Female	Hysterectomy	No	Ia	I	G1	8380-3	EC	No	Superficial	Yes	No	Unknown	Unknown	Unknown	Unknown	No	MSS	0	None	0	Yes	pMMR	R	None	None	None	NSMP	None	None
202200188	52	Female	Hysterectomy	No	II	II	G3	8380-3	EC	No	Superficial	Yes	No	Yes	No	Unknown	Unknown	Yes	MSS	0	None	0	Yes	pMMR	R	None	None	None	NSMP	None	None
202200189	85	Female	Hysterectomy	Yes	Ia	I	G3	8441-3	SC	Yes	Superficial	No	No	Yes	Yes	Unknown	Unknown	No	MSS	0	None	0	Yes	pMMR	R	None	None	None	p53-abn	None	None
202200190	49	Female	Hysterectomy	Yes	Ia	I	G2	8380-3	EC	No	Superficial	Yes	No	Yes	No	Unknown	Unknown	No	MSS	0	None	0	Yes	pMMR	R	None	None	None	p53-abn	None	None
202200191	67	Female	Hysterectomy	Yes	Ia	I	G3	8441-3	SC	No	Superficial	No	No	Yes	No	Unknown	Unknown	No	MSS	0	None	0	Yes	pMMR	R	None	None	None	p53-abn	None	None
202200196	58	Female	Curettage	No	Ib	I	G1	8380-3	EC	Yes	Deep	Yes	No	Yes	No	Unknown	Unknown	No	MSS	0	None	0	Yes	pMMR	R	None	None	None	NSMP	None	None
202200199	64	Female	Curettage	No	Ia	I	G2	8380-3	EC	Yes	Superficial	Yes	No	Unknown	Unknown	Unknown	Unknown	No	MSS	0	None	0	Yes	pMMR	R	None	None	None	POLEmut	V411L(G>T)	None
202200204	52	Female	Hysterectomy	No	Ib	I	G2	8380-3	EC	Yes	Deep	Yes	No	Yes	Yes	Unknown	Unknown	No	MSS	0	None	0	Yes	pMMR	R	None	None	None	NSMP	None	None
202200206	53	Female	Hysterectomy	Yes	IIIc	III	G3	8441-3	SC	Yes	Deep	Yes	Yes	Yes	No	Unknown	Unknown	No	MSS	0	None	0	Yes	pMMR	R	None	None	None	p53-abn	None	None
202200207	37	Female	Curettage	No	IIIa	III	G1	8380-3	EC	No	Superficial	Yes	No	Yes	Yes	Unknown	Unknown	No	MSS	0	None	0	Yes	pMMR	R	None	None	None	NSMP	None	None
202200208	56	Female	Curettage	Yes	II	II	G3	8441-3	SC	No	Superficial	Yes	No	Yes	Yes	Unknown	No	No	MSI-H	2B	B	2	Yes	dMMR	MSH2+MSH6	None	None	None	MMRd	None	None
202200209	33	Female	Hysterectomy	No	Ib	I	G2	8380-3	EC	No	Superficial	Yes	No	Unknown	Unknown	Unknown	Unknown	No	MSS	0	None	0	Yes	pMMR	R	None	None	None	NSMP	None	None
202200210	51	Female	Hysterectomy	Yes	IIIc	III	G3	8441-3	SC	Yes	Deep	Yes	Yes	Yes	Yes	Unknown	Unknown	No	MSS	0	None	0	Yes	pMMR	R	None	None	None	p53-abn	None	None
202200211	59	Female	Curettage	No	Ia	I	G1	8380-3	EC	No	Superficial	No	No	Unknown	Unknown	Unknown	Unknown	No	MSS	0	None	0	Yes	pMMR	R	None	None	None	NSMP	None	None
202200212	51	Female	Hysterectomy	No	Ia	I	G1	8380-3	EC	No	Superficial	Yes	No	Unknown	Unknown	Unknown	Unknown	No	MSS	0	None	0	Yes	pMMR	R	None	None	None	NSMP	None	None
202200213	50	Female	Hysterectomy	No	Ia	I	G1	8380-3	EC	No	Superficial	Yes	No	Yes	No	Unknown	Unknown	No	MSS	0	None	0	Yes	pMMR	R	None	None	None	NSMP	None	None
202200218	47	Female	Hysterectomy	No	IIIc	III	G2	8380-3	EC	Yes	Deep	Yes	Yes	Yes	Yes	Unknown	Unknown	No	MSS	0	None	0	Yes	pMMR	R	None	None	None	NSMP	None	None
202200219	59	Female	Hysterectomy	No	Ia	I	G1	8380-3	EC	Yes	Superficial	Yes	No	Yes	Yes	Unknown	Unknown	No	MSS	0	None	0	Yes	pMMR	R	None	None	None	NSMP	None	None
202200220	48	Female	Hysterectomy	No	II	II	G1	8380-3	EC	No	Superficial	Yes	No	Yes	Yes	Unknown	Unknown	Yes	MSS	0	None	0	Yes	pMMR	R	None	None	None	NSMP	None	None
202200221	79	Female	Hysterectomy	No	Ib	I	G1	8380-3	EC	No	Deep	No	No	Yes	Yes	Unknown	Unknown	No	MSS	0	None	0	Yes	pMMR	R	None	None	None	NSMP	None	None
202200222	56	Female	Curettage	No	Ia	I	G1	8380-3	EC	Yes	Superficial	Yes	No	Yes	Yes	Unknown	No	No	MSI-H	2B+1D	B/D	3	Yes	dMMR	MSH2+MSH6	None	None	None	MMRd	None	None
202200224	52	Female	Hysterectomy	Yes	Ia	I	G3	8380-3	EC	No	Superficial	Yes	No	Unknown	Unknown	Unknown	Unknown	No	MSS	0	None	0	Yes	pMMR	R	None	None	None	p53-abn	None	None
202200225	59	Female	Curettage	No	Ia	I	G2	8380-3	EC	Yes	Superficial	Yes	No	Yes	Yes	Unknown	Unknown	No	MSS	0	None	0	Yes	pMMR	R	None	None	None	NSMP	None	None
202100004	57	Female	Hysterectomy	No	Ia	I	G1	8380-3	EC	Yes	Superficial	Yes	No	No	No	Unknown	Unknown	No	MSS	0	None	0	Yes	pMMR	R	None	None	None	None	None	None
202100005	56	Female	Hysterectomy	No	Ia	I	G2	8380-3	EC	Yes	Superficial	Yes	No	Yes	Yes	Unknown	Unknown	No	MSS	0	None	0	Yes	pMMR	R	None	None	None	None	None	None
202100006	67	Female	Hysterectomy	Yes	Ia	I	G3	8980-3	CS	Yes	Superficial	Yes	No	Yes	Yes	Unknown	No	No	MSI-H	2B	B	2	Yes	dMMR	MSH2+MSH6	None	None	None	None	None	None
202100007	56	Female	Curettage	No	IIIa	III	G3	8441-3	SC	No	Superficial	Yes	No	Yes	Yes	Unknown	Unknown	Yes	MSS	0	None	0	Yes	pMMR	R	None	None	None	None	None	None
202100010	48	Female	Curettage	No	Ia	I	G2	8380-3	EC	No	Superficial	Yes	No	No	No	Unknown	Unknown	No	MSS	0	None	0	Yes	pMMR	R	None	None	None	None	None	None
202100011	71	Female	Hysterectomy	No	Ia	I	G1	8380-3	EC	No	Superficial	Yes	No	No	No	Unknown	Unknown	No	MSS	0	None	0	Yes	pMMR	R	None	None	None	None	None	None
202100014	51	Female	Hysterectomy	No	Ib	I	G2	8380-3	EC	Yes	Deep	Yes	No	Yes	Yes	Unknown	No	No	MSI-H	2B	B	2	Yes	dMMR	MLH1+PMS2	None	None	None	None	None	None
202100015	48	Female	Hysterectomy	No	Ia	I	G1	8380-3	EC	No	Superficial	Yes	No	Unknown	Unknown	Yes	Yes	Yes	MSS	0	None	0	No	dMMR	MSH2+MSH6	MSS	MSS	MSH6	MMRd	None	None
202100016	51	Female	Hysterectomy	No	IIIb	III	G3	8020-3	UC	Yes	Deep	Yes	No	Yes	Yes	Unknown	Unknown	No	MSS	0	None	0	Yes	pMMR	R	None	None	None	None	None	None
202100017	54	Female	Hysterectomy	No	Ia	I	G1	8380-3	EC	No	Superficial	Yes	No	Unknown	Unknown	Unknown	Unknown	No	MSS	0	None	0	Yes	pMMR	R	None	None	None	None	None	None
202100019	60	Female	Curettage	No	Ia	I	G2	8380-3	EC	Yes	Superficial	Yes	No	Yes	Yes	Unknown	No	No	MSI-H	2B	B	2	Yes	dMMR	MLH1+PMS2	None	None	None	None	None	None
202200227	50	Female	Curettage	No	Ia	I	G1	8380-3	EC	No	Superficial	Yes	No	Yes	Yes	Unknown	Unknown	No	MSS	0	None	0	Yes	pMMR	R	None	None	None	NSMP	None	None
202200228	58	Female	Curettage	No	Ia	I	G3	8310-3	CC	Yes	Superficial	Yes	No	Yes	Yes	Unknown	No	No	MSI-H	2B+1D	B/D	3	Yes	dMMR	MSH6	None	None	None	MMRd	None	None
202200229	52	Female	Hysterectomy	Yes	IIIc	III	G3	8323-3	MC	No	Deep	Yes	Yes	Yes	Yes	Unknown	Unknown	No	MSS	0	None	0	Yes	pMMR	R	None	None	None	POLEmut	V411L(G>T)	None
202200230	48	Female	Curettage	No	Ia	I	G1	8380-3	EC	No	Superficial	Yes	No	Unknown	Unknown	Unknown	Unknown	No	MSS	0	None	0	Yes	pMMR	R	None	None	None	NSMP	None	None
202200231	68	Female	Hysterectomy	No	Ib	I	G2	8380-3	EC	No	Deep	Yes	No	Yes	Yes	Unknown	Unknown	No	MSS	0	None	0	Yes	pMMR	R	None	None	None	NSMP	None	None
202200239	54	Female	Curettage	No	Ib	I	G1	8380-3	EC	No	Deep	No	No	Yes	Yes	Unknown	Unknown	Yes	MSS	0	None	0	Yes	pMMR	R	None	None	None	NSMP	None	None
202200240	48	Female	Curettage	No	Ia	I	G1	8380-3	EC	No	Superficial	No	No	No	No	Unknown	Unknown	No	MSS	0	None	0	Yes	pMMR	R	None	None	None	NSMP	None	None
202200241	65	Female	Hysterectomy	No	Ia	I	G2	8380-3	EC	No	Superficial	Yes	No	Unknown	Unknown	Unknown	Unknown	No	MSS	0	None	0	Yes	pMMR	R	None	None	None	NSMP	None	None
202200242	68	Female	Hysterectomy	No	Ia	I	G2	8380-3	EC	No	Superficial	Yes	No	Unknown	Unknown	Unknown	Unknown	No	MSS	0	None	0	Yes	pMMR	R	None	None	None	NSMP	None	None
202200243	65	Female	Curettage	No	Ia	I	G1	8380-3	EC	No	Superficial	Yes	No	Unknown	Unknown	Unknown	Unknown	No	MSS	0	None	0	Yes	pMMR	R	None	None	None	NSMP	None	None
202200244	53	Female	Curettage	No	Ia	I	G1	8380-3	EC	No	Superficial	Yes	No	Unknown	Unknown	Unknown	Unknown	No	MSS	0	None	0	Yes	pMMR	R	None	None	None	NSMP	None	None
202200245	59	Female	Hysterectomy	No	Ia	I	G1	8380-3	EC	No	Superficial	Yes	No	Unknown	Unknown	Unknown	No	No	MSI-H	2B+2D	B/D	4	Yes	dMMR	MLH1+PMS2	None	None	None	MMRd	None	None
202200246	64	Female	Hysterectomy	No	Ia	I	G1	8380-3	EC	No	Superficial	Yes	No	Unknown	Unknown	Unknown	Unknown	No	MSS	0	None	0	Yes	pMMR	R	None	None	None	NSMP	None	None
202200247	59	Female	Curettage	No	Ia	I	G1	8380-3	EC	No	Superficial	Yes	No	Yes	No	Unknown	Unknown	No	MSS	0	None	0	Yes	pMMR	R	None	None	None	NSMP	None	None
202200248	63	Female	Curettage	No	Ia	I	G1	8380-3	EC	No	Superficial	Yes	No	Yes	Yes	Unknown	Unknown	No	MSS	0	None	0	Yes	pMMR	R	None	None	None	NSMP	None	None
202200249	51	Female	Curettage	No	IIIc	III	G3	8020-3	UC	Yes	Deep	Yes	Yes	Unknown	Unknown	Unknown	Unknown	No	MSS	0	None	0	Yes	pMMR	R	None	None	None	NSMP	None	None
202200250	46	Female	Curettage	No	Ia	I	G1	8380-3	EC	No	Superficial	Yes	No	Unknown	Unknown	Unknown	Unknown	No	MSS	0	None	0	Yes	pMMR	R	None	None	None	NSMP	None	None
202200251	53	Female	Hysterectomy	No	Ia	I	G1	8380-3	EC	No	Superficial	Yes	No	Unknown	Unknown	Unknown	Unknown	No	MSS	0	None	0	Yes	pMMR	R	None	None	None	NSMP	None	None
202200252	51	Female	Hysterectomy	No	Ia	I	G1	8380-3	EC	No	Superficial	No	No	Unknown	Unknown	Unknown	No	Yes	MSI-H	2B+2D	B/D	4	Yes	dMMR	MLH1+PMS2	None	None	None	MMRd	None	None
202200253	55	Female	Hysterectomy	No	II	II	G3	8380-3	EC	No	Superficial	Yes	No	Unknown	Unknown	Unknown	No	No	MSI-H	2D	D	2	Yes	dMMR	MLH1+PMS2	None	None	None	MMRd	None	None
202200254	49	Female	Hysterectomy	No	IIIc	III	G3	8020-3	UC	Yes	Deep	Yes	Yes	Yes	Yes	Unknown	No	Yes	MSI-H	2B	B	2	Yes	dMMR	MSH2+MSH6	None	None	None	MMRd	None	None
202200255	50	Female	Hysterectomy	No	Ia	I	G1	8380-3	EC	No	Superficial	Yes	No	Unknown	Unknown	Unknown	Unknown	No	MSS	0	None	0	Yes	pMMR	R	None	None	None	NSMP	None	None
202200260	51	Female	Curettage	No	Ib	I	G1	8380-3	EC	No	Deep	Yes	No	Yes	Yes	Unknown	Unknown	No	MSS	0	None	0	Yes	pMMR	R	None	None	None	NSMP	None	None
202200261	46	Female	Curettage	Yes	II	II	G2	8380-3	EC	No	Superficial	Yes	No	Yes	Yes	Unknown	Unknown	No	MSS	0	None	0	Yes	pMMR	R	None	None	None	p53-abn	None	None
202200262	69	Female	Hysterectomy	No	Ia	I	G1	8380-3	EC	No	Superficial	Yes	No	Yes	Yes	Unknown	Unknown	No	MSS	0	None	0	Yes	pMMR	R	None	None	None	NSMP	None	None
202200265	52	Female	Hysterectomy	No	II	II	G1	8380-3	EC	No	Superficial	Yes	No	Yes	Yes	Unknown	Unknown	No	MSS	0	None	0	Yes	pMMR	R	None	None	None	NSMP	None	None
202200266	68	Female	Curettage	No	Ia	I	G2	8380-3	EC	No	Superficial	No	No	Yes	Yes	Unknown	Unknown	No	MSS	0	None	0	Yes	pMMR	R	None	None	None	NSMP	None	None
202200271	48	Female	Hysterectomy	No	Ia	I	G2	8380-3	EC	No	Superficial	Yes	No	Yes	Yes	Unknown	Unknown	No	MSS	0	None	0	Yes	pMMR	R	None	None	None	NSMP	None	None
202200272	52	Female	Hysterectomy	No	IIIa	III	G1	8380-3	EC	No	Superficial	Yes	No	Unknown	Unknown	Unknown	Unknown	No	MSS	0	None	0	Yes	pMMR	R	None	None	None	NSMP	None	None
202200273	58	Female	Hysterectomy	No	Ib	I	G2	8380-3	EC	No	Deep	Yes	No	Yes	Yes	Unknown	Unknown	No	MSS	0	None	0	Yes	pMMR	R	None	None	None	NSMP	None	None
202200274	50	Female	Hysterectomy	No	IIIc	III	G3	8323-3	MC	No	Deep	Yes	Yes	Unknown	Unknown	Unknown	No	No	MSI-H	2B	B	2	Yes	dMMR	MSH6	None	None	None	MMRd	None	None
202200277	53	Female	Curettage	No	Ia	I	G1	8380-3	EC	No	Superficial	No	No	Unknown	Unknown	Unknown	Unknown	Unknown	MSS	0	None	0	Yes	pMMR	R	None	None	None	NSMP	None	None
202200280	74	Female	Curettage	No	Ia	I	G1	8380-3	EC	No	Superficial	Yes	No	Unknown	Unknown	No	No	No	MSI-H	2B	B	2	Yes	dMMR	MLH1+PMS2	None	None	None	MMRd	None	None
202200281	54	Female	Curettage	No	Ia	I	G1	8380-3	EC	No	Superficial	Yes	No	Unknown	Unknown	Unknown	No	Yes	MSI-H	2B+2D	B/D	4	Yes	dMMR	MLH1+PMS2	None	None	None	MMRd	None	None
202200282	50	Female	Curettage	No	Ia	I	G1	8380-3	EC	No	Superficial	No	No	Unknown	Unknown	Unknown	No	No	MSS	0	None	0	Yes	pMMR	R	None	None	None	NSMP	None	None
202200283	59	Female	Curettage	No	Ia	I	G1	8380-3	EC	No	Superficial	No	No	Unknown	Unknown	Unknown	No	No	MSS	0	None	0	Yes	pMMR	R	None	None	None	NSMP	None	None
202200284	53	Female	Curettage	No	Ia	I	G1	8380-3	EC	No	Superficial	No	No	Unknown	Unknown	Unknown	No	No	MSI-H	2B+2D	B/D	4	Yes	dMMR	MLH1+PMS2	None	None	None	MMRd	None	None
202200286	63	Female	Hysterectomy	No	IIIc	III	G3	8380-3	EC	Yes	Deep	Yes	Yes	Unknown	Unknown	Unknown	No	No	MSS	0	None	0	Yes	pMMR	R	None	None	None	NSMP	None	None
202200287	51	Female	Hysterectomy	No	Ia	I	G2	8380-3	EC	No	Superficial	No	No	Unknown	Unknown	Unknown	No	No	MSS	0	None	0	Yes	pMMR	R	None	None	None	NSMP	None	None
202200288	54	Female	Hysterectomy	No	IVb	IV	G2	8380-3	EC	Yes	Deep	Yes	Yes	Unknown	Unknown	Unknown	No	No	MSS	0	None	0	Yes	pMMR	R	None	None	None	NSMP	None	None
202200289	53	Female	Curettage	No	Ia	I	G3	8980-3	CS	No	Superficial	Yes	No	Yes	Yes	Unknown	No	No	MSI-H	2B	B	2	Yes	dMMR	MLH1+PMS2	None	None	None	MMRd	None	None
202200290	56	Female	Hysterectomy	Yes	IIIc	III	G3	8380-3	EC	Yes	Deep	Yes	Yes	Unknown	Unknown	Unknown	No	No	MSS	0	None	0	Yes	pMMR	R	None	None	None	p53-abn	None	None
202200297	54	Female	Hysterectomy	No	Ia	I	G1	8380-3	EC	No	Superficial	Yes	No	Unknown	Unknown	Unknown	No	No	MSS	0	None	0	Yes	pMMR	R	None	None	None	NSMP	None	None
202200298	48	Female	Hysterectomy	No	Ia	I	G3	8310-3	CC	No	Superficial	No	No	Yes	Yes	Unknown	No	No	MSS	0	None	0	Yes	pMMR	R	None	None	None	NSMP	None	None
202200299	54	Female	Curettage	No	Ia	I	G1	8380-3	EC	No	Superficial	No	No	Unknown	Unknown	Unknown	No	No	MSI-H	1B+1D	B/D	2	Yes	dMMR	MLH1+PMS2	None	None	None	MMRd	None	None
202200302	57	Female	Curettage	No	Ib	I	G3	8980-3	CS	Yes	Deep	Yes	No	Yes	Yes	Unknown	No	No	MSS	0	None	0	Yes	pMMR	R	None	None	None	NSMP	None	None
202200303	25	Female	Hysterectomy	No	Ia	I	G1	8980-3	EC	No	Superficial	No	No	Unknown	Unknown	Unknown	No	No	MSS	0	None	0	Yes	pMMR	R	None	None	None	NSMP	None	None
202200305	58	Female	Hysterectomy	No	IIIc	III	G2	8380-3	EC	Yes	Deep	Yes	Yes	Unknown	Unknown	Unknown	No	No	MSS	0	None	0	Yes	pMMR	R	None	None	None	NSMP	None	None
202200307	55	Female	Curettage	No	Ia	I	G1	8380-3	EC	No	Superficial	Yes	No	Unknown	Unknown	Unknown	No	No	MSI-H	2B	B	2	Yes	dMMR	MLH1+PMS2	None	None	None	MMRd	None	None
202200310	53	Female	Hysterectomy	No	Ia	I	G1	8380-3	EC	No	Superficial	Yes	No	Unknown	Unknown	Unknown	No	No	MSS	0	None	0	Yes	pMMR	R	None	None	None	NSMP	None	None
202200311	53	Female	Hysterectomy	No	Ia	I	G1	8380-3	EC	No	Superficial	Yes	No	Unknown	Unknown	Unknown	No	No	MSS	0	None	0	Yes	pMMR	R	None	None	None	POLEmut	A456P(G>C)	None
202200314	34	Female	Hysterectomy	No	Ia	I	G1	8380-3	EC	No	Superficial	No	No	Unknown	Unknown	Unknown	Unknown	Unknown	MSS	0	None	0	Yes	pMMR	R	None	None	None	NSMP	None	None
202200315	54	Female	Curettage	Yes	Ia	I	G2	8380-3	EC	No	Superficial	Yes	No	Unknown	Unknown	Unknown	Unknown	Unknown	MSS	0	None	0	Yes	pMMR	R	None	None	None	p53-abn	None	None
202200319	52	Female	Hysterectomy	No	Ia	I	G1	8380-3	EC	No	Superficial	Yes	No	Unknown	Unknown	Unknown	Unknown	Unknown	MSS	0	None	0	Yes	pMMR	R	None	None	None	NSMP	None	None
202200322	69	Female	Hysterectomy	Yes	Ib	I	G3	8323-3	MC	Yes	Deep	Yes	No	Unknown	Unknown	Unknown	Unknown	Unknown	MSI-H	2B+1D	B/D	3	Yes	dMMR	MLH1+PMS2	None	None	None	MMRd	None	None
202200325	61	Female	Hysterectomy	No	Ia	I	G3	8323-3	MC	No	Superficial	Yes	No	Unknown	Unknown	Unknown	Unknown	Unknown	MSI-H	2B	B	2	Yes	dMMR	MSH6	None	None	None	MMRd	None	None
202200326	53	Female	Curettage	Yes	Ia	I	G3	8380-3	EC	No	Superficial	No	No	Unknown	Unknown	Unknown	Unknown	Unknown	MSS	0	None	0	Yes	pMMR	R	None	None	None	p53-abn	None	None
202200328	56	Female	Curettage	No	Ia	I	G3	8380-3	EC	No	Superficial	Yes	No	Unknown	Unknown	Unknown	Unknown	Unknown	MSS	0	None	0	Yes	pMMR	R	None	None	None	NSMP	None	None
202200329	54	Female	Hysterectomy	No	Ia	I	G1	8380-3	EC	No	Superficial	No	No	Unknown	Unknown	Unknown	Unknown	Unknown	MSI-H	2B+1D	B/D	3	Yes	dMMR	MSH6	None	None	None	MMRd	None	None
202200334	66	Female	Hysterectomy	No	Ia	I	G1	8380-3	EC	No	Superficial	Yes	No	Unknown	Unknown	Unknown	Unknown	Unknown	MSS	0	None	0	Yes	pMMR	R	None	None	None	NSMP	None	None
202200337	51	Female	Curettage	No	Ia	I	G1	8380-3	EC	No	Superficial	Yes	No	Unknown	Unknown	Unknown	Unknown	Unknown	MSS	0	None	0	Yes	pMMR	R	None	None	None	NSMP	None	None
202200338	39	Female	Hysterectomy	Yes	Ia	I	G3	8310-3	CC	No	Superficial	Yes	No	Unknown	Unknown	Unknown	Unknown	Unknown	MSS	0	None	0	Yes	pMMR	R	None	None	None	p53-abn	None	None
202200340	52	Female	Curettage	No	Ia	I	G1	8380-3	EC	No	Superficial	Yes	No	Unknown	Unknown	Unknown	Unknown	Unknown	MSS	0	None	0	Yes	pMMR	R	None	None	None	POLEmut	V411L(G>C)	None
202200341	52	Female	Curettage	No	Ia	I	G1	8380-3	EC	No	Superficial	No	No	Unknown	Unknown	Unknown	Unknown	Unknown	MSS	0	None	0	Yes	pMMR	R	None	None	None	None	None	None
202200342	54	Female	Curettage	No	Ib	I	G2	8380-3	EC	No	Deep	Yes	No	Unknown	Unknown	Unknown	Unknown	Unknown	MSI-L	1D	D	1	Yes	pMMR	R	None	None	None	POLEmut	V411L(G>T)	None
202200347	66	Female	Hysterectomy	No	IIIc	III	G3	9111-3	MLA	Yes	Deep	Yes	Yes	Unknown	Unknown	Unknown	Unknown	Unknown	MSS	0	None	0	Yes	pMMR	R	None	None	None	NSMP	None	None
202200348	46	Female	Hysterectomy	No	IIIc	III	G1	8380-3	EC	Yes	Deep	No	Yes	Unknown	Unknown	Unknown	Unknown	Unknown	MSS	0	None	0	Yes	pMMR	R	None	None	None	NSMP	None	None
202200350	58	Female	Curettage	No	Ia	I	G1	8380-3	EC	No	Superficial	Yes	No	Unknown	Unknown	Unknown	Unknown	Unknown	MSS	0	None	0	Yes	pMMR	R	None	None	None	NSMP	None	None
202200356	49	Female	Hysterectomy	No	Ia	I	G2	8380-3	EC	Yes	Superficial	Yes	No	Unknown	Unknown	Unknown	Unknown	Unknown	MSS	0	None	0	Yes	pMMR	R	None	None	None	NSMP	None	None
202200357	50	Female	Hysterectomy	No	Ia	I	G1	8380-3	EC	No	Superficial	Yes	No	Unknown	Unknown	Unknown	Unknown	Unknown	MSS	0	None	0	Yes	pMMR	R	None	None	None	NSMP	None	None
202200358	34	Female	Curettage	Yes	Ia	I	G2	8380-3	EC	No	Superficial	Yes	No	Unknown	Unknown	Unknown	No	No	MSS	0	None	0	Yes	pMMR	R	None	None	None	POLEmut	PMS286R(C>G)	None
202200359	55	Female	Hysterectomy	No	Ib	I	G2	8380-3	EC	Yes	Deep	Yes	No	Yes	Yes	Unknown	No	No	MSS	0	None	0	Yes	pMMR	R	None	None	None	POLEmut	P436R(C-G)	None
202200360	40	Female	Hysterectomy	No	Ia	I	G1	8380-3	EC	No	Superficial	Yes	No	Unknown	Unknown	Unknown	Unknown	Unknown	MSS	0	None	0	Yes	pMMR	R	None	None	None	NSMP	None	None
202200361	26	Female	Curettage	No	Ia	I	G1	8380-3	EC	No	Superficial	Yes	No	Unknown	Unknown	Unknown	Unknown	Unknown	MSS	0	None	0	Yes	pMMR	R	None	None	None	NSMP	None	None
202200362	37	Female	Hysterectomy	No	Ia	I	G2	8380-3	EC	No	Superficial	No	No	Unknown	Unknown	Unknown	Unknown	Unknown	MSS	0	None	0	Yes	pMMR	R	None	None	None	NSMP	None	None
202200363	75	Female	Curettage	No	Ia	I	G2	8380-3	EC	No	Superficial	Yes	No	Unknown	Unknown	Unknown	Unknown	Unknown	MSS	0	None	0	Yes	pMMR	R	None	None	None	NSMP	None	None
202200364	49	Female	Hysterectomy	No	Ib	I	G1	8380-3	EC	No	Deep	Yes	No	Unknown	Unknown	Unknown	Unknown	Unknown	MSS	0	None	0	Yes	pMMR	R	None	None	None	NSMP	None	None
202200365	32	Female	Curettage	No	IIIc	III	G1	8380-3	EC	Yes	Deep	Yes	Yes	Unknown	Unknown	Unknown	Unknown	Unknown	MSI-L	1D	D	1	Yes	pMMR	R	None	None	None	NSMP	None	None
202200367	49	Female	Hysterectomy	No	Ib	I	G2	8380-3	EC	No	Deep	Yes	No	Unknown	Unknown	Unknown	Unknown	Unknown	MSS	0	None	0	Yes	pMMR	R	None	None	None	NSMP	None	None
202200378	54	Female	Curettage	No	Ia	I	G2	8380-3	EC	No	Superficial	Yes	No	Unknown	Unknown	Unknown	Unknown	Unknown	MSS	0	None	0	Yes	pMMR	R	None	None	None	NSMP	None	None
202200379	54	Female	Hysterectomy	No	IIIa	III	G3	8380-3	EC	Yes	Deep	Yes	No	Unknown	Unknown	Unknown	Unknown	Unknown	MSI-H	2D	D	2	Yes	dMMR	MLH1+PMS2	None	None	None	MMRd	None	None
202200380	48	Female	Hysterectomy	No	Ia	I	G1	8380-3	EC	No	Superficial	Yes	No	Yes	Unknown	Unknown	No	Yes	MSS	0	None	0	Yes	pMMR	R	None	None	None	POLEmut	V411L(G>T)	None
202200381	33	Female	Hysterectomy	No	Ia	I	G1	8380-3	EC	No	Superficial	No	No	Unknown	Unknown	Unknown	Unknown	Unknown	MSS	0	None	0	Yes	pMMR	R	None	None	None	NSMP	None	None
202200382	52	Female	Curettage	No	Ia	I	G1	8380-3	EC	No	Superficial	No	No	Unknown	Unknown	Unknown	Unknown	Unknown	MSS	0	None	0	Yes	pMMR	R	None	None	None	NSMP	None	None
202200383	66	Female	Hysterectomy	No	Ia	I	G1	8380-3	EC	No	Superficial	Yes	No	Unknown	Unknown	Unknown	Unknown	Unknown	MSS	0	None	0	Yes	pMMR	R	None	None	None	NSMP	None	None
202200385	29	Female	Hysterectomy	No	IVb	IV	G1	8380-3	EC	No	Superficial	Yes	No	Unknown	Unknown	Unknown	Unknown	Unknown	MSS	0	None	0	Yes	pMMR	R	None	None	None	NSMP	None	None
202200386	53	Female	Curettage	No	Ia	I	G1	8380-3	EC	No	Superficial	Yes	No	Unknown	Unknown	Unknown	Unknown	Unknown	MSI-H	2B+1D	B/D	3	Yes	dMMR	MLH1+PMS2	None	None	None	MMRd	None	None
202200387	44	Female	Curettage	No	Ia	I	G1	8380-3	EC	No	Superficial	Yes	No	Unknown	Unknown	Unknown	Unknown	Unknown	MSI-H	1B+1D	B/D	2	Yes	dMMR	MSH2+MSH6	None	None	None	MMRd	None	None
202200388	56	Female	Hysterectomy	No	Ia	I	G3	8323-3	MC	No	Superficial	Yes	No	Unknown	Unknown	Unknown	Unknown	Unknown	MSS	0	None	0	Yes	pMMR	R	None	None	None	NSMP	None	None
202200389	52	Female	Hysterectomy	No	IIIc	III	G3	8323-3	MC	Yes	Superficial	Yes	Yes	Yes	Unknown	Unknown	No	No	MSI-H	2B	B	2	Yes	dMMR	MSH2+MSH6	None	None	None	MMRd	None	None
202200390	37	Female	Hysterectomy	No	Ia	I	G2	8380-3	EC	No	Superficial	Yes	No	Unknown	Unknown	Unknown	No	No	MSS	0	None	0	Yes	pMMR	R	None	None	None	NSMP	None	None
202200391	69	Female	Curettage	No	Ib	I	G1	8380-3	EC	Yes	Deep	Yes	No	Unknown	Yes	Unknown	No	No	MSS	0	None	0	Yes	pMMR	R	None	None	None	NSMP	None	None
202200392	54	Female	Curettage	No	II	II	G1	8380-3	EC	No	Superficial	No	No	Unknown	Yes	Unknown	Unknown	Unknown	MSI-H	2B+2D	B/D	4	Yes	dMMR	MLH1+PMS2	None	None	None	MMRd	None	None
202200393	43	Female	Curettage	No	Ia	I	G1	8380-3	EC	No	Superficial	No	No	Unknown	Unknown	Unknown	Unknown	Unknown	MSS	0	None	0	Yes	pMMR	R	None	None	None	NSMP	None	None
202200396	65	Female	Hysterectomy	Yes	Ib	I	G3	8020-3	UC	No	Deep	Yes	No	Unknown	Unknown	Unknown	Unknown	Unknown	MSI-H	2B+1D	B/D	3	Yes	dMMR	MLH1+PMS2	None	None	None	MMRd	None	None
202200397	48	Female	Hysterectomy	No	Ia	I	G1	8380-3	EC	No	Superficial	Yes	No	Unknown	Unknown	Unknown	Unknown	Unknown	MSS	0	None	0	Yes	pMMR	R	None	None	None	NSMP	None	None
202200401	38	Female	Curettage	No	Ia	I	G1	8380-3	EC	No	Superficial	No	No	Yes	Yes	Unknown	Unknown	Unknown	MSS	0	None	0	Yes	pMMR	R	None	None	None	NSMP	None	None
202200405	68	Female	Hysterectomy	No	Ib	I	G2	8380-3	EC	No	Deep	Yes	No	Unknown	Unknown	Unknown	No	No	MSS	0	None	0	Yes	pMMR	R	None	None	None	NSMP	None	None
202200408	60	Female	Hysterectomy	No	Ia	I	G2	8380-3	EC	Yes	Superficial	Yes	No	Yes	Yes	Unknown	No	No	MSS	0	None	0	Yes	pMMR	R	None	None	None	NSMP	None	None
202200409	59	Female	Curettage	Yes	Ia	I	G3	8323-3	MC	No	Superficial	Yes	No	Yes	Unknown	Unknown	No	No	MSS	0	None	0	Yes	pMMR	R	None	None	None	p53-abn	None	None
202200410	58	Female	Hysterectomy	No	II	II	G1	8380-3	EC	No	Deep	Yes	No	Yes	Unknown	Unknown	No	Yes	MSS	0	None	0	Yes	pMMR	R	None	None	None	NSMP	None	None
202200411	58	Female	Curettage	Yes	IIIc	III	G3	8441-3	SC	No	Superficial	Yes	Yes	Unknown	Unknown	Unknown	Yes	No	MSS	0	None	0	Yes	pMMR	R	None	None	None	p53-abn	None	None
202200413	47	Female	Hysterectomy	No	Ia	I	G1	8380-3	EC	No	Superficial	No	No	Unknown	Unknown	Unknown	No	No	MSS	0	None	0	Yes	pMMR	R	None	None	None	NSMP	None	None
202200414	50	Female	Curettage	No	II	II	G1	8380-3	EC	No	Superficial	Yes	No	Unknown	Yes	Unknown	Unknown	Unknown	MSS	0	None	0	Yes	pMMR	R	None	None	None	NSMP	None	None
202200415	60	Female	Curettage	No	Ib	I	G2	8380-3	EC	Yes	Deep	Yes	No	Unknown	Yes	Unknown	No	Yes	MSS	0	None	0	Yes	pMMR	R	None	None	None	NSMP	None	None
202200420	49	Female	Curettage	No	II	II	G1	8380-3	EC	No	Superficial	Yes	No	Yes	Unknown	Unknown	No	Yes	MSI-H	1B+2D	B/D	3	Yes	dMMR	MLH1+PMS2	None	None	None	MMRd	None	None
202200422	57	Female	Curettage	No	Ia	I	G1	8380-3	EC	No	Superficial	Yes	No	Unknown	Unknown	Unknown	No	No	MSS	0	None	0	Yes	pMMR	R	None	None	None	NSMP	None	None
202300001	52	Female	Curettage	No	Ia	I	G3	8441-3	SC	No	Superficial	Yes	No	Unknown	Unknown	Unknown	Unknown	Unknown	MSS	0	None	0	Yes	pMMR	R	None	None	None	POLEmut	V411L(G>C)	None
202300005	49	Female	Hysterectomy	No	Ia	I	G2	8380-3	EC	No	Superficial	Yes	No	Unknown	Unknown	Unknown	No	Yes	MSS	0	None	0	Yes	pMMR	R	None	None	None	NSMP	None	None
202300007	48	Female	Hysterectomy	No	IIIc	III	G2	8380-3	EC	Yes	Superficial	Yes	Yes	Yes	Unknown	Unknown	No	No	MSI-H	2B+3D	B/D	5	Yes	dMMR	PMS2	None	None	None	MMRd	None	None
202300008	54	Female	Curettage	No	Ia	I	G1	8380-3	EC	No	Superficial	Yes	No	Unknown	Unknown	Unknown	Unknown	Unknown	MSS	0	None	0	Yes	pMMR	R	None	None	None	NSMP	None	None
202300010	57	Female	Hysterectomy	Yes	IVb	IV	G3	8441-3	SC	No	Superficial	No	No	Yes	Yes	Unknown	No	Yes	MSS	0	None	0	Yes	pMMR	R	None	None	None	p53-abn	None	None
202300011	35	Female	Curettage	No	Ia	I	G1	8380-3	EC	No	Superficial	No	No	Unknown	Unknown	Unknown	No	No	MSS	0	None	0	Yes	pMMR	R	None	None	None	NSMP	None	None
202300012	65	Female	Curettage	No	Ia	I	G1	8380-3	EC	No	Superficial	No	No	Unknown	Unknown	Unknown	Unknown	Unknown	MSI-H	2B+2D	B/D	4	Yes	dMMR	PMS2	None	None	None	MMRd	None	None
202300014	57	Female	Curettage	No	Ia	I	G1	8380-3	EC	No	Superficial	Yes	No	Unknown	Unknown	Unknown	Unknown	Unknown	MSS	0	None	0	Yes	pMMR	R	None	None	None	NSMP	None	None
202300016	67	Female	Curettage	Yes	IIIa	III	G3	8323-3	MC	No	Superficial	Yes	No	Unknown	Unknown	Unknown	No	No	MSS	0	None	0	Yes	pMMR	R	None	None	None	p53-abn	None	None
202300017	59	Female	Curettage	No	Ia	I	G1	8380-3	EC	No	Superficial	Yes	No	Unknown	Unknown	Unknown	No	No	MSS	0	None	0	Yes	pMMR	R	None	None	None	NSMP	None	None
202300018	58	Female	Hysterectomy	Yes	Ia	I	G3	8323-3	MC	No	Superficial	Yes	No	Yes	Unknown	Unknown	No	No	MSS	0	None	0	Yes	pMMR	R	None	None	None	p53-abn	None	None
202300019	27	Female	Curettage	No	Ia	I	G1	8380-3	EC	No	Superficial	No	No	Unknown	Unknown	Unknown	Unknown	Unknown	MSS	0	None	0	Yes	pMMR	R	None	None	None	NSMP	None	None
202300020	53	Female	Curettage	No	IIIc	III	G1	8380-3	EC	No	Deep	Yes	No	Yes	Unknown	Unknown	No	No	MSS	0	None	0	Yes	pMMR	R	None	None	None	NSMP	None	None
202300021	40	Female	Curettage	No	Ia	I	G1	8380-3	EC	No	Superficial	No	No	Unknown	Unknown	Unknown	No	No	MSI-H	2B+3D	B/D	5	Yes	dMMR	PMS2	None	None	None	MMRd	None	None
202300023	58	Female	Curettage	No	Ia	I	G2	8380-3	EC	No	Superficial	Yes	No	Unknown	Unknown	Unknown	Unknown	Unknown	MSI-H	1B+3D	B/D	4	Yes	dMMR	PMS2	None	None	None	MMRd	None	None
202300024	46	Female	Curettage	No	Ia	I	G3	8380-3	EC	No	Superficial	Yes	No	Unknown	Unknown	Unknown	No	No	MSI-H	1B+2D	B/D	3	Yes	dMMR	MLH1+PMS2	None	None	None	MMRd	None	None
202300025	47	Female	Hysterectomy	No	II	II	G1	8380-3	EC	No	Superficial	Yes	No	Yes	Unknown	Unknown	No	Yes	MSI-H	2B+2D	B/D	4	Yes	dMMR	MSH2+MSH6	None	None	None	MMRd	None	None
202300026	56	Female	Hysterectomy	No	II	II	G2	8380-3	EC	No	Superficial	Yes	No	Yes	Unknown	Unknown	No	Yes	MSS	0	None	0	Yes	pMMR	R	None	None	None	NSMP	None	None
202300029	52	Female	Curettage	No	Ia	I	G2	8380-3	EC	No	Superficial	No	No	Unknown	Unknown	Unknown	No	Yes	MSS	0	None	0	Yes	pMMR	R	None	None	None	NSMP	None	None
202300031	54	Female	Hysterectomy	No	IIIc	III	G1	8380-3	EC	No	Deep	Yes	Yes	Yes	Unknown	Unknown	No	Yes	MSS	0	None	0	Yes	pMMR	R	None	None	None	NSMP	None	None
202300034	55	Female	Curettage	No	Ia	I	G2	8380-3	EC	No	Superficial	No	No	Unknown	Unknown	Unknown	No	No	MSS	0	None	0	Yes	pMMR	R	None	None	None	None	None	None
202300035	64	Female	Curettage	No	Ia	I	G1	8380-3	EC	No	Superficial	No	No	Unknown	Unknown	Unknown	No	No	MSS	0	None	0	Yes	pMMR	R	None	None	None	NSMP	None	None
202300036	39	Female	Hysterectomy	No	II	II	G1	8380-3	EC	No	Superficial	No	No	Unknown	Unknown	Unknown	No	No	MSS	0	None	0	Yes	pMMR	R	None	None	None	NSMP	None	None
202300039	34	Female	Hysterectomy	No	Ia	I	G1	8380-3	EC	No	Superficial	Yes	No	Unknown	Unknown	Unknown	No	No	MSS	0	None	0	Yes	pMMR	R	None	None	None	NSMP	None	None
202300040	47	Female	Curettage	No	Ia	I	G1	8380-3	EC	No	Superficial	Yes	No	Unknown	Unknown	Unknown	No	No	MSS	0	None	0	Yes	pMMR	R	None	None	None	NSMP	None	None
202300041	66	Female	Curettage	No	IIIc	III	G3	8380-3	EC	No	Superficial	Yes	Yes	Unknown	Unknown	Unknown	Unknown	Unknown	MSI-H	1B+1D	B/D	2	Yes	dMMR	MLH1+PMS2	None	None	None	MMRd	None	None
202300045	51	Female	Hysterectomy	No	Ia	I	G1	8380-3	EC	No	Superficial	Yes	No	Unknown	Unknown	Unknown	No	No	MSI-H	2B+1D	B/D	3	Yes	dMMR	MLH1+PMS2	None	None	None	MMRd	None	None
202300046	39	Female	Hysterectomy	No	Ib	I	G1	8380-3	EC	Yes	Deep	No	No	Unknown	Unknown	Unknown	Unknown	Unknown	MSS	0	None	0	Yes	pMMR	R	None	None	None	NSMP	None	None
202300047	46	Female	Curettage	No	Ia	I	G1	8380-3	EC	No	Superficial	Yes	No	Unknown	Unknown	Unknown	No	Yes	MSS	0	None	0	Yes	pMMR	R	None	None	None	NSMP	None	None
202300048	71	Female	Hysterectomy	Yes	Ib	I	G3	8323-3	MC	Yes	Deep	No	No	Unknown	Unknown	Unknown	No	Yes	MSS	0	None	0	Yes	pMMR	R	None	None	None	p53-abn	None	None
202300049	53	Female	Hysterectomy	Yes	Ia	I	G3	8323-3	MC	Yes	Superficial	Yes	No	Unknown	Unknown	Unknown	No	No	MSS	0	None	0	Yes	pMMR	R	None	None	None	p53-abn	None	None
202300050	25	Female	Curettage	No	Ia	I	G1	8380-3	EC	No	Superficial	Yes	No	Unknown	Unknown	Unknown	No	No	MSS	0	None	0	Yes	pMMR	R	None	None	None	NSMP	None	None
202300051	49	Female	Curettage	No	Ia	I	G1	8380-3	EC	No	Superficial	Yes	No	Unknown	Unknown	Unknown	Unknown	Unknown	MSI-H	1B+2D	B/D	3	Yes	dMMR	MSH2+MSH6	None	None	None	MMRd	None	None
202300052	58	Female	Hysterectomy	No	Ia	I	G1	8380-3	EC	Yes	Superficial	Yes	No	Yes	Unknown	Unknown	No	No	MSI-H	2B+3D	B/D	5	Yes	dMMR	MLH1+PMS2	None	None	None	MMRd	None	None
202300053	81	Female	Hysterectomy	No	Ia	I	G1	8380-3	EC	No	Superficial	Yes	No	Unknown	Unknown	Unknown	Unknown	Unknown	MSS	0	None	0	Yes	pMMR	R	None	None	None	NSMP	None	None
202300055	48	Female	Curettage	Yes	Ia	I	G3	8380-3	EC	No	Superficial	Yes	No	Yes	Unknown	Unknown	No	No	MSS	0	None	0	Yes	pMMR	R	None	None	None	p53-abn	None	None
202300056	53	Female	Hysterectomy	No	Ia	I	G1	8380-3	EC	No	Superficial	No	No	Unknown	Unknown	Unknown	Unknown	Unknown	MSI-H	1B+3D	B/D	4	Yes	dMMR	MLH1+PMS2	None	None	None	MMRd	None	None
202300057	43	Female	Hysterectomy	No	Ia	I	G1	8380-3	EC	No	Superficial	No	No	Unknown	Unknown	Unknown	No	No	MSS	0	None	0	Yes	pMMR	R	None	None	None	NSMP	None	None
202300058	57	Female	Hysterectomy	Yes	IIIa	III	G3	8323-3	MC	Yes	Deep	Yes	No	Yes	Unknown	Unknown	No	No	MSI-H	2B+1D	B/D	3	Yes	dMMR	MLH1+PMS2	None	None	None	MMRd	None	None
202300060	59	Female	Hysterectomy	No	Ic	I	G1	8380-3	EC	No	Superficial	No	No	Yes	Yes	Unknown	No	Yes	MSS	0	None	0	Yes	pMMR	R	None	None	None	NSMP	None	None
202300061	63	Female	Hysterectomy	No	Ia	I	G1	8380-3	EC	No	Superficial	Yes	No	Unknown	Unknown	Unknown	Unknown	Unknown	MSS	0	None	0	Yes	pMMR	R	None	None	None	NSMP	None	None
202300063	54	Female	Curettage	Yes	Ia	I	G1	8380-3	EC	No	Superficial	Yes	No	Unknown	Unknown	Unknown	No	No	MSI-H	2B+3D	B/D	5	Yes	dMMR	MLH1+PMS2	None	None	None	MMRd	None	None
202300064	66	Female	Hysterectomy	No	Ib	I	G2	8380-3	EC	No	Deep	No	No	Unknown	Unknown	Unknown	No	No	MSS	0	None	0	Yes	pMMR	R	None	None	None	POLEmut	PMS286R(C>G)	None
202300065	55	Female	Curettage	Yes	IIIc	III	G1	8380-3	EC	No	Superficial	Yes	Yes	Unknown	Unknown	Unknown	No	No	MSI-H	2B	B	2	Yes	dMMR	MSH2+MSH6	None	None	None	MMRd	None	None
202300066	55	Female	Hysterectomy	No	Ib	I	G1	8380-3	EC	Yes	Deep	No	No	Unknown	Unknown	Unknown	No	No	MSS	0	None	0	Yes	pMMR	R	None	None	None	NSMP	None	None
202300067	52	Female	Curettage	No	IIIc	III	G3	8980-3	CS	Yes	Deep	Yes	Yes	Unknown	Unknown	Unknown	Unknown	Unknown	MSI-H	1B+1D	B/D	2	Yes	dMMR	MLH1+PMS2	None	None	None	MMRd	None	None
202300069	40	Female	Hysterectomy	No	Ia	I	G1	8980-3	EC	No	Superficial	No	No	Unknown	Unknown	Unknown	Unknown	Unknown	MSS	0	None	0	Yes	pMMR	R	None	None	None	NSMP	None	None
202300073	61	Female	Hysterectomy	No	Ib	I	G1	8380-3	EC	Yes	Deep	No	No	Unknown	Unknown	Unknown	No	No	MSS	0	None	0	Yes	pMMR	R	None	None	None	NSMP	None	None
202300075	51	Female	Curettage	No	Ia	I	G1	8380-3	EC	No	Superficial	No	No	Unknown	Unknown	Unknown	Unknown	Unknown	MSS	0	None	0	Yes	pMMR	R	None	None	None	NSMP	None	None
202300076	58	Female	Hysterectomy	No	Ib	I	G1	8380-3	EC	Yes	Deep	No	No	Unknown	Unknown	Unknown	Unknown	Unknown	MSS	0	None	0	Yes	pMMR	R	None	None	None	NSMP	None	None
202300077	49	Female	Curettage	No	Ia	I	G1	8380-3	EC	No	Superficial	No	No	Unknown	Unknown	Unknown	No	No	MSS	0	None	0	Yes	pMMR	R	None	None	None	POLEmut	PMS286R(C>G)	None
202300080	54	Female	Curettage	No	Ia	I	G1	8380-3	EC	No	Superficial	Yes	No	Unknown	Unknown	Unknown	Unknown	Unknown	MSS	0	None	0	Yes	pMMR	R	None	None	None	NSMP	None	None
202300081	64	Female	Hysterectomy	Yes	Ib	I	G3	8323-3	MC	No	Deep	No	No	Unknown	Unknown	Unknown	Unknown	Unknown	MSS	0	None	0	Yes	pMMR	R	None	None	None	p53-abn	None	None
202300082	45	Female	Hysterectomy	No	IVb	IV	G2	8380-3	EC	No	Deep	Yes	No	Unknown	Unknown	Unknown	Unknown	Unknown	MSI-H	2B+3D	B/D	5	Yes	dMMR	MLH1+PMS2	None	None	None	MMRd	None	None
202300083	74	Female	Hysterectomy	Yes	Ia	I	G3	8441-3	SC	No	Superficial	No	No	Unknown	Unknown	Unknown	Unknown	Unknown	MSS	0	None	0	Yes	pMMR	R	None	None	None	p53-abn	None	None
202300084	51	Female	Curettage	No	Ia	I	G1	8380-3	EC	No	Superficial	No	No	Unknown	Unknown	Unknown	Unknown	Unknown	MSS	0	None	0	Yes	pMMR	R	None	None	None	NSMP	None	None
202300085	51	Female	Curettage	No	Ia	I	G2	8380-3	EC	No	Superficial	No	No	Unknown	Unknown	Unknown	Unknown	Unknown	MSI-H	1B+1D	B/D	2	Yes	dMMR	MSH2+MSH6	None	None	None	MMRd	None	None
202300086	52	Female	Hysterectomy	No	II	II	G1	8380-3	EC	No	Superficial	Yes	No	Unknown	Unknown	Unknown	Unknown	Unknown	MSS	0	None	0	Yes	pMMR	R	None	None	None	NSMP	None	None
202300087	51	Female	Hysterectomy	No	II	II	G1	8380-3	EC	No	Superficial	No	No	Unknown	Unknown	Unknown	Unknown	Unknown	MSS	0	None	0	Yes	pMMR	R	None	None	None	NSMP	None	None
202300089	60	Female	Hysterectomy	No	IIIc	III	G2	8380-3	EC	Yes	Deep	Yes	Yes	Unknown	Unknown	Unknown	Unknown	Unknown	MSS	0	None	0	Yes	pMMR	R	None	None	None	NSMP	None	None
202300090	67	Female	Hysterectomy	No	Ia	I	G3	8310-3	CC	No	Superficial	No	No	Unknown	Unknown	Unknown	Unknown	Unknown	MSS	0	None	0	Yes	pMMR	R	None	None	None	NSMP	None	None
202300091	51	Female	Hysterectomy	No	Ia	I	G1	8380-3	EC	No	Superficial	No	No	Unknown	Unknown	Unknown	Unknown	Unknown	MSS	0	None	0	Yes	pMMR	R	None	None	None	NSMP	None	None
202300093	67	Female	Hysterectomy	No	Ib	I	G3	8980-3	CS	Yes	Deep	Yes	No	Unknown	Unknown	Unknown	Unknown	Unknown	MSS	0	None	0	Yes	pMMR	R	None	None	None	NSMP	None	None
202300096	52	Female	Hysterectomy	No	Ia	I	G1	8380-3	EC	No	Superficial	No	No	Unknown	Unknown	Unknown	No	No	MSS	0	None	0	Yes	pMMR	R	None	None	None	NSMP	None	None
202300097	48	Female	Hysterectomy	Yes	IVb	IV	G3	8441-3	SC	Yes	Deep	Yes	No	Unknown	Unknown	Unknown	Unknown	Unknown	MSS	0	None	0	Yes	pMMR	R	None	None	None	p53-abn	None	None
202300098	30	Female	Curettage	No	Ia	I	G1	8380-3	EC	No	Superficial	No	No	Unknown	Unknown	Unknown	Unknown	Unknown	MSS	0	None	0	Yes	pMMR	R	None	None	None	NSMP	None	None
202300099	87	Female	Hysterectomy	No	IVb	IV	G2	8380-3	EC	Yes	Deep	No	No	Unknown	Unknown	Unknown	Unknown	Unknown	MSS	0	None	0	Yes	pMMR	R	None	None	None	None	None	None
202300100	47	Female	Hysterectomy	No	Ia	I	G3	8380-3	EC	Yes	Superficial	Yes	No	Unknown	Unknown	Unknown	Unknown	Unknown	MSI-H	2B+1D	B/D	3	Yes	dMMR	MLH1+PMS2	None	None	None	MMRd	None	None
202300102	54	Female	Curettage	No	Ia	I	G3	8380-3	EC	No	Superficial	Yes	No	Unknown	Unknown	Unknown	Unknown	Unknown	MSS	0	None	0	Yes	pMMR	R	None	None	None	POLEmut	S297F(C>T)	None
202300103	52	Female	Curettage	No	Ia	I	G1	8380-3	EC	No	Superficial	No	No	Unknown	Unknown	Unknown	Unknown	Unknown	MSS	0	None	0	Yes	pMMR	R	None	None	None	NSMP	None	None
202300105	64	Female	Curettage	Yes	IVb	IV	G3	8441-3	SC	No	Superficial	Yes	No	Unknown	Unknown	Unknown	Unknown	Unknown	MSS	0	None	0	Yes	pMMR	R	None	None	None	p53-abn	None	None
202300106	57	Female	Curettage	No	Ib	I	G1	8380-3	EC	No	Deep	Yes	No	Unknown	Unknown	Unknown	Unknown	Unknown	MSS	0	None	0	Yes	pMMR	R	None	None	None	NSMP	None	None
202300107	53	Female	Hysterectomy	No	Ia	I	G1	8380-3	EC	No	Superficial	Yes	No	Unknown	Unknown	Unknown	Unknown	Unknown	MSS	0	None	0	Yes	pMMR	R	None	None	None	POLEmut	S297F(C>T)	None
202200004	48	Female	Curettage	No	Unknown	Unknown	Unknown	Unknown	Unknown	No	Superficial	Unknown	Unknown	Unknown	Unknown	Unknown	Unknown	No	MSS	0	None	None	No	Exclude	MLH1+PMS2	None	None	None	None	None	None
202200007	36	Female	Hysterectomy	No	Unknown	Unknown	Unknown	Unknown	Unknown	No	Unknown	Unknown	Unknown	Unknown	Unknown	Unknown	Unknown	No	MSS	0	None	None	Yes	Exclude	R	None	None	None	None	None	None
202200012	55	Female	Hysterectomy	No	Unknown	Unknown	Unknown	Unknown	Unknown	Unknown	Unknown	Unknown	Unknown	Unknown	Unknown	Unknown	Unknown	No	MSI-H	2B+2D	B/D	4	None	Exclude	None	None	None	None	None	None	None
202200017	50	Female	Curettage	No	Unknown	Unknown	Unknown	Unknown	Unknown	Unknown	Unknown	Unknown	Unknown	Unknown	Unknown	Unknown	Unknown	No	MSS	0	None	None	Yes	Exclude	R	None	None	None	None	None	None
202200019	48	Female	Curettage	No	Unknown	Unknown	G1	Unknown	Unknown	No	Unknown	Unknown	Unknown	Unknown	Unknown	Unknown	Unknown	No	MSS	0	None	None	Yes	Exclude	R	None	None	None	None	None	None
202200028	53	Female	Curettage	Unknown	Unknown	Unknown	Unknown	Unknown	Unknown	Unknown	Unknown	Unknown	Unknown	Unknown	Unknown	Unknown	Unknown	No	MSS	0	None	None	Yes	Exclude	R	None	None	None	None	None	None
202200031	32	Female	Curettage	Unknown	Unknown	Unknown	Unknown	Unknown	Unknown	Unknown	Unknown	Unknown	Unknown	Unknown	Unknown	Unknown	Unknown	No	MSS	0	None	None	None	Exclude	None	None	None	None	None	None	None
202200042	33	Female	Hysterectomy	No	Unknown	Unknown	Unknown	Unknown	Unknown	Unknown	Unknown	Unknown	Unknown	Unknown	Unknown	Unknown	Unknown	No	MSS	0	None	None	Yes	Exclude	R	None	None	None	None	None	None
202200043	41	Female	Hysterectomy	No	Unknown	Unknown	Unknown	Unknown	Unknown	Unknown	Unknown	Unknown	Unknown	Unknown	Unknown	Unknown	Unknown	No	MSS	0	None	None	Yes	Exclude	R	None	None	None	None	None	None
202200080	54	Female	Curettage	Yes	Unknown	Unknown	Unknown	Unknown	Unknown	Unknown	Unknown	Unknown	Unknown	Unknown	Unknown	Unknown	Unknown	No	MSS	0	None	None	None	Exclude	None	None	None	None	None	None	None
202200106	53	Female	Curettage	Unknown	Unknown	Unknown	Unknown	Unknown	Unknown	Unknown	Unknown	Unknown	Unknown	Unknown	Unknown	Unknown	Unknown	No	MSI-H	2B+2D	B/D	4	None	Exclude	None	None	None	None	MMRd	None	None
202200124	50	Female	Curettage	No	II	II	Unknown	8323-3	MC	Unknown	Superficial	Unknown	Unknown	Unknown	Unknown	Unknown	Unknown	No	MSS	0	None	None	Yes	Exclude	R	None	None	None	NSMP	None	None
202200159	72	Female	Curettage	Yes	Unknown	Unknown	Unknown	Unknown	Unknown	Unknown	Unknown	Unknown	Unknown	Unknown	Unknown	Unknown	Unknown	No	MSS	0	None	None	None	Exclude	None	None	None	None	p53-abn	None	None
202200165	52	Female	Curettage	Unknown	Unknown	Unknown	Unknown	Unknown	Unknown	Unknown	Unknown	Unknown	Unknown	Unknown	Unknown	Unknown	Unknown	No	MSS	0	None	None	Yes	Exclude	MLH1	None	None	None	None	None	None
202200168	65	Female	Hysterectomy	Yes	Unknown	Unknown	Unknown	Unknown	Unknown	Unknown	Unknown	Unknown	Unknown	Unknown	Unknown	Unknown	Unknown	No	MSS	0	None	None	Exclude	Exclude	None	None	None	None	p53-abn	None	None
202200174	51	Female	Hysterectomy	No	Unknown	Unknown	Unknown	Unknown	Unknown	Unknown	Unknown	Unknown	Unknown	Unknown	Unknown	Unknown	Unknown	No	MSS	0	None	None	None	Exclude	None	None	None	None	NSMP	None	None
202200180	49	Female	Curettage	No	Unknown	Unknown	Unknown	Unknown	Unknown	Unknown	Unknown	Unknown	Unknown	Unknown	Unknown	Unknown	Unknown	No	MSS	0	None	None	None	Exclude	None	None	None	None	NSMP	None	None
202200184	27	Female	Curettage	No	Unknown	Unknown	Unknown	Unknown	Unknown	Unknown	Unknown	Unknown	Unknown	Unknown	Unknown	Unknown	Unknown	No	MSS	0	None	None	Yes	Exclude	R	None	None	None	None	None	None
202200192	66	Female	Curettage	No	Unknown	Unknown	Unknown	Unknown	Unknown	Unknown	Unknown	Unknown	Unknown	Unknown	Unknown	Unknown	Unknown	No	MSS	0	None	None	Yes	Exclude	R	None	None	None	NSMP	None	None
202200200	44	Female	Curettage	No	Unknown	Unknown	Unknown	Unknown	Unknown	Unknown	Unknown	Unknown	Unknown	Unknown	Unknown	Unknown	Unknown	No	MSS	0	None	None	None	Exclude	None	None	None	None	NSMP	None	None
202200223	58	Female	Curettage	No	Blank	Blank	Blank	Blank	Blank	Blank	Blank	Blank	Blank	Blank	Blank	Unknown	Unknown	Blank	Blank	Blank	None	None	None	Exclude	None	None	None	None	NSMP	None	None
202200226	47	Female	Hysterectomy	No	Blank	Blank	Blank	Blank	Blank	Blank	Blank	Blank	Blank	Blank	Blank	Unknown	Unknown	Blank	Blank	Blank	None	None	None	Exclude	None	None	None	None	NSMP	None	None
202100001	68	Female	Hysterectomy	No	Blank	Blank	Blank	Blank	Blank	Blank	Blank	Blank	Blank	Blank	Blank	Unknown	Unknown	Blank	MSS	0	None	None	Yes	Exclude	R	None	None	None	None	None	None
202100002	48	Female	Curettage	Unknown	Blank	Blank	Blank	Blank	Blank	Blank	Blank	Blank	Blank	Blank	Blank	Unknown	Unknown	Blank	MSI-H	2B	B	2	Yes	Exclude	MLH1+PMS2	None	None	None	None	None	None
202100003	30	Female	Curettage	Unknown	Blank	Blank	Blank	Blank	Blank	Blank	Blank	Blank	Blank	Blank	Blank	Unknown	Unknown	Blank	MSS	0	None	None	Yes	Exclude	R	None	None	None	None	None	None
202100008	20	Female	Curettage	Unknown	Blank	Blank	Blank	Blank	Blank	Blank	Blank	Blank	Blank	Blank	Blank	Unknown	Unknown	Blank	MSS	0	None	None	None	Exclude	None	None	None	None	None	None	None
202100009	43	Female	Curettage	No	Blank	Blank	Blank	Blank	Blank	Blank	Blank	Blank	Blank	Blank	Blank	Unknown	Unknown	Blank	MSS	0	None	None	None	Exclude	None	None	None	None	None	None	None
202100012	22	Female	Curettage	No	Blank	Blank	Blank	Blank	Blank	Blank	Blank	Blank	Blank	Unknown	Unknown	Unknown	Unknown	Blank	MSS	0	None	None	Yes	Exclude	R	None	None	None	None	None	None
202100018	55	Female	Hysterectomy	No	Blank	Blank	Blank	8323-3	MC	Blank	Blank	Blank	Blank	Blank	Blank	Unknown	Unknown	Blank	MSI-H	2B	B	2	Yes	Exclude	MLH1+PMS2	None	None	None	None	None	None
202200264	48	Female	Hysterectomy	No	Blank	Blank	G3	8380-3	EC	Blank	Blank	Blank	Blank	Blank	Blank	Unknown	Unknown	Blank	MSS	0	None	None	Yes	Exclude	R	None	None	None	None	None	None
202200267	41	Female	Curettage	No	Blank	Blank	Blank	Blank	Blank	Blank	Blank	Blank	Blank	Blank	Blank	Unknown	Unknown	Blank	MSS	0	None	None	Yes	Exclude	R	None	None	None	NSMP	None	None
202200268	46	Female	Curettage	No	Blank	Blank	Blank	Blank	Blank	Blank	Blank	Blank	Blank	Blank	Blank	Unknown	Unknown	Blank	MSS	0	None	None	Yes	Exclude	R	None	None	None	NSMP	None	None
202200295	49	Female	Curettage	No	Ia	I	G3	8380-3	EC	No	Superficial	No	No	Unknown	Unknown	Unknown	No	No	MSS	0	None	None	None	Exclude	None	None	None	None	None	None	None
202200323	59	Female	Curettage	No	Unknown	Unknown	Unknown	Unknown	Unknown	Unknown	Unknown	Unknown	Unknown	Unknown	Unknown	Unknown	Unknown	Unknown	MSS	0	None	None	Yes	Exclude	R	None	None	None	NSMP	None	None
202200330	44	Female	Hysterectomy	No	II	II	G2	8380-3	EC	No	Superficial	Yes	No	Unknown	Unknown	Unknown	Unknown	Unknown	MSS	0	None	None	None	Exclude	None	None	None	None	NSMP	None	None
202200343	52	Female	Curettage	No	Ia	I	G1	8380-3	EC	No	Superficial	No	No	Unknown	Unknown	Unknown	Unknown	Unknown	MSS	0	None	None	None	Exclude	None	None	None	None	NSMP	None	None
202200345	51	Female	Hysterectomy	No	Ia	I	G1	8380-3	EC	No	Superficial	Yes	No	Unknown	Unknown	Unknown	Unknown	Unknown	MSI-H	2B+2D	B/D	4	None	Exclude	None	None	None	None	None	None	None
202200349	50	Female	Hysterectomy	No	Ia	I	G1	8380-3	EC	No	Superficial	Yes	No	Unknown	Unknown	Unknown	Unknown	Unknown	MSS	0	None	None	None	Exclude	None	None	None	None	NSMP	None	None
202200366	36	Female	Curettage	No	Ia	I	G1	8380-3	EC	No	Superficial	No	No	Unknown	Unknown	Unknown	Unknown	Unknown	MSI-H	2B	B	2	None	Exclude	None	None	None	None	MMRd	None	None
202200384	53	Female	Curettage	Yes	IVb	IV	G1	8380-3	EC	No	Superficial	Yes	No	Unknown	Unknown	Unknown	Unknown	Unknown	MSS	0	None	None	None	Exclude	None	None	None	None	p53-abn	None	None
202300003	70	Female	Curettage	Yes	II	II	Unknown	8441-3	SC	No	Deep	No	No	Unknown	Unknown	Unknown	Unknown	Unknown	MSS	0	None	None	None	Exclude	None	None	None	None	p53-abn	None	None
202300004	66	Female	Curettage	No	Ia	I	Unknown	8310-3	CC	No	Superficial	Yes	No	Unknown	Unknown	Unknown	No	Unknown	MSS	0	None	None	None	Exclude	None	None	None	None	NSMP	None	None
202300015	67	Female	Hysterectomy	Yes	II	II	Unknown	8441-3	SC	Yes	Superficial	Yes	No	Yes	Yes	Unknown	No	No	MSS	0	None	None	None	Exclude	None	None	None	None	p53-abn	None	None
202300030	29	Female	Curettage	No	Ia	I	G1	8380-3	EC	No	Superficial	No	No	Unknown	Unknown	Unknown	No	No	MSS	0	None	None	None	Exclude	None	None	None	None	NSMP	None	None
202300037	67	Female	Curettage	No	Unknown	Unknown	G1	8380-3	EC	Unknown	Unknown	Unknown	Unknown	Unknown	Unknown	Unknown	Unknown	Unknown	MSS	0	None	None	None	Exclude	None	None	None	None	NSMP	None	None
202300054	38	Female	Curettage	No	Unknown	Unknown	Unknown	Unknown	Unknown	Unknown	Unknown	Unknown	Unknown	Unknown	Unknown	Unknown	Unknown	Unknown	MSS	0	None	None	Yes	Exclude	R	None	None	None	None	None	None
202300059	59	Female	Hysterectomy	No	Ib	I	G1	8380-3	EC	No	Deep	No	No	Unknown	Unknown	Unknown	Unknown	Unknown	MSI-L	1B	B	1	None	Exclude	None	None	None	None	NSMP	None	None
202300095	57	Female	Hysterectomy	No	Ia	I	G1	8980-3	EC	No	Superficial	No	No	Unknown	Unknown	Unknown	Unknown	Unknown	None	0	None	None	No	Exclude	MSH2+MSH6	None	None	None	NSMP	None	None

## Sheet: Sheet2
Record No.	Age	Gender	Specimen	p53 abnormal	FIGO (2009)	FIGO	GRADE	ICD-10	Histology	LVSI	MuscularNoneinvasion	Lymphadenectomy	LymphaticNonemetastasis	Chemotherapy	Radiotherapy	NACT	PersonalNonehistory	Family_history	MSI_anaylsis_NCI_panel	MSI_site	MSI_pattern	MSI_number	MMR/MSI_Consistency	MMR_status	Affected MMR proteins	MSI_promega_panel_analysis	NGS_MSI_analysis	Germline_Mutation	Triaged MMRd-EC
1	51	Female	Curettage	No	Ia	I	G1	8380-3	EC	No	Superficial	Yes	No	No	No	No	No	No	MSI-H	2B+3D	B/D	5	Yes	dMMR	MLH1+PMS2	None	None	None	None
2	46	Female	Hysterectomy	No	Ia	I	G1	8380-3	EC	No	Superficial	Yes	No	Unknown	Unknown	Unknown	Unknown	Yes	MSS	0	None	0	Yes	pMMR	R	None	None	None	None
3	57	Female	Hysterectomy	No	Ia	I	G1	8380-3	EC	No	Superficial	Yes	No	Unknown	Unknown	Unknown	Unknown	No	MSS	0	None	0	Yes	pMMR	R	None	None	None	None
5	54	Female	Curettage	No	Ia	I	G1	8380-3	EC	No	Superficial	No	No	Unknown	Unknown	Unknown	Unknown	No	MSS	0	None	0	Yes	pMMR	R	None	None	None	None
6	48	Female	Curettage	No	Ib	I	G1	8380-3	EC	No	Deep	Yes	No	Unknown	Unknown	Unknown	Unknown	No	MSS	0	None	0	Yes	pMMR	R	None	None	None	None
8	41	Female	Curettage	Yes	Ia	I	G3	8323-3	MC	No	Superficial	Yes	No	Unknown	Unknown	Unknown	Unknown	No	MSS	0	None	0	Yes	pMMR	R	None	None	None	None
9	56	Female	Hysterectomy	No	Ia	I	G2	8380-3	EC	No	Superficial	No	No	Unknown	Unknown	Unknown	Unknown	No	MSS	0	None	0	Yes	pMMR	R	None	None	None	None
10	45	Female	Hysterectomy	Yes	Ib	I	G3	8380-3	EC	Yes	Deep	Yes	No	Unknown	Unknown	Unknown	No	No	MSI-H	1B+1D	B/D	2	Yes	dMMR	MSH2+MSH6	None	None	None	None
11	68	Female	Hysterectomy	No	IIIc	III	G3	8441-3	SC	Yes	Deep	Yes	Yes	No	Yes	Unknown	Unknown	Yes	MSS	0	None	0	Yes	pMMR	R	None	None	None	None
13	58	Female	Curettage	No	Ia	I	G1	8380-3	EC	No	Superficial	Yes	No	Unknown	Unknown	Unknown	No	No	MSI-H	1B+1D	B/D	2	Yes	dMMR	MLH1+PMS2	None	None	None	None
18	53	Female	Hysterectomy	No	Ia	I	G1	8380-3	EC	No	Superficial	No	No	Unknown	Unknown	Unknown	Unknown	No	MSS	0	None	0	Yes	pMMR	R	None	None	None	None
25	49	Female	Hysterectomy	No	Ia	I	G1	8380-3	EC	No	Superficial	Yes	No	Unknown	Unknown	Unknown	Unknown	No	MSS	0	None	0	Yes	pMMR	R	None	None	None	None
26	55	Female	Hysterectomy	No	Ia	I	G1	8380-3	EC	Yes	Superficial	Yes	No	Unknown	Unknown	Unknown	No	No	MSI-H	2B	B	2	Yes	dMMR	MLH1+PMS2	None	MSI-H	None	None
27	58	Female	Hysterectomy	No	IIIc	III	G1	8380-3	EC	Yes	Superficial	Yes	Yes	Yes	Yes	No	No	No	MSS	0	None	0	No	dMMR	MLH1+PMS2	MSS	MSS	No	MMRd
29	58	Female	Hysterectomy	Yes	Ia	I	G3	8323-3	MC	No	Superficial	Yes	No	Unknown	Unknown	Unknown	No	No	MSI-H	2B+2D	B/D	4	Yes	dMMR	MLH1+PMS2	None	None	None	None
30	41	Female	Hysterectomy	No	Ia	I	G2	8380-3	EC	No	Superficial	Yes	No	Unknown	Unknown	Unknown	No	Yes	MSI-H	1B+1D	B/D	2	Yes	dMMR	MLH1+PMS2	None	None	None	None
32	53	Female	Hysterectomy	No	Ia	I	G2	8380-3	EC	No	Superficial	Yes	No	Unknown	Unknown	Unknown	Unknown	No	MSS	0	None	0	Yes	pMMR	R	None	None	None	None
33	52	Female	Hysterectomy	No	Ia	I	G2	8380-3	EC	No	Superficial	Yes	No	Yes	Yes	Unknown	Unknown	No	MSS	0	None	0	Yes	pMMR	R	None	None	None	None
34	46	Female	Hysterectomy	Yes	Ia	I	G3	8323-3	MC	No	Superficial	Yes	No	Yes	No	Unknown	Unknown	No	MSS	0	None	0	Yes	pMMR	R	None	None	None	None
35	45	Female	Hysterectomy	No	IIIc	III	G3	8380-3	EC	Yes	Superficial	Yes	Yes	Yes	Yes	Unknown	No	No	MSI-H	2B	B	2	Yes	dMMR	MLH1+PMS2	None	None	None	None
47	43	Female	Hysterectomy	No	Ia	I	G1	8380-3	EC	No	Superficial	Yes	No	Yes	No	Unknown	No	No	MSI-H	2B	B	2	Yes	dMMR	MSH2+MSH6	None	None	None	None
48	59	Female	Hysterectomy	No	Ia	I	G3	8380-3	EC	No	Superficial	Yes	No	Unknown	Unknown	Unknown	No	No	MSI-H	2B+2D	B/D	4	Yes	dMMR	MLH1+PMS2	None	None	None	None
49	50	Female	Curettage	No	Ia	I	G3	8380-3	EC	Yes	Deep	No	No	Unknown	Unknown	Unknown	No	No	MSI-H	2B	B	2	Yes	dMMR	MLH1+PMS2	None	None	None	None
50	57	Female	Curettage	Yes	Ia	I	G1	8380-3	EC	No	Superficial	Yes	No	Unknown	Unknown	No	No	No	MSI-L	1B	B	1	No	dMMR	MSH6	MSS	MSI-L	MSH6	MMRd-p53abn
51	67	Female	Hysterectomy	No	Ia	I	G1	8380-3	EC	No	Superficial	Yes	No	Unknown	Unknown	Unknown	Unknown	No	MSS	0	None	0	Yes	pMMR	R	None	None	None	None
55	53	Female	Curettage	No	Ia	I	G1	8380-3	EC	No	Superficial	Yes	No	Unknown	Unknown	Unknown	No	No	MSI-H	2B	B	2	Yes	dMMR	MSH6	None	None	None	None
56	33	Female	Hysterectomy	No	Ia	I	G1	8380-3	EC	No	Superficial	Yes	No	Unknown	Unknown	Unknown	Unknown	No	MSS	0	None	0	Yes	pMMR	R	None	None	None	None
57	50	Female	Hysterectomy	No	II	II	G1	8380-3	EC	No	Superficial	No	No	Unknown	Unknown	Unknown	Unknown	No	MSS	0	None	0	Yes	pMMR	R	None	None	None	None
58	40	Female	Hysterectomy	No	Ia	I	G1	8380-3	EC	No	Superficial	Yes	No	Unknown	Unknown	Unknown	No	Yes	MSI-H	2B	B	2	Yes	dMMR	MLH1+PMS2	None	None	None	None
59	51	Female	Curettage	No	Ia	I	G2	8380-3	EC	No	Superficial	Yes	No	Unknown	Unknown	Unknown	No	No	MSI-H	2B+3D	B/D	5	Yes	dMMR	PMS2	None	None	None	None
60	52	Female	Hysterectomy	No	IIIa	III	G3	8380-3	EC	Yes	Deep	Yes	No	Yes	No	Unknown	No	No	MSI-H	2B+2D	B/D	4	Yes	dMMR	MLH1+PMS2	None	None	None	None
61	57	Female	Curettage	No	Ib	I	G1	8380-3	EC	No	Deep	Yes	No	Unknown	Unknown	Unknown	Unknown	No	MSS	0	None	0	Yes	pMMR	R	None	None	None	None
62	54	Female	Hysterectomy	Yes	IIIc	III	G3	8441-3	SC	Yes	Deep	Yes	Yes	Yes	No	Unknown	Unknown	No	MSS	0	None	0	Yes	pMMR	R	None	None	None	None
63	52	Female	Hysterectomy	No	Ia	I	G1	8380-3	EC	No	Superficial	Yes	No	Unknown	Unknown	Unknown	No	No	MSI-H	2B	B	2	Yes	dMMR	MLH1+PMS2	None	None	None	None
65	68	Female	Curettage	No	Ia	I	G1	8380-3	EC	No	Superficial	Yes	No	Unknown	Unknown	Unknown	Unknown	No	MSS	0	None	0	Yes	pMMR	R	None	None	None	None
66	69	Female	Hysterectomy	No	Ib	I	G1	8380-3	EC	No	Deep	Yes	No	No	Yes	Unknown	Unknown	No	MSS	0	None	0	Yes	pMMR	R	None	None	None	None
67	81	Female	Curettage	No	Ia	I	G3	8310-3	CC	Yes	Superficial	No	No	Yes	Yes	Unknown	Unknown	No	MSS	0	None	0	Yes	pMMR	R	None	None	None	None
68	57	Female	Hysterectomy	No	IIIc	III	G2	8380-3	EC	Yes	Deep	Yes	Yes	Yes	Yes	Unknown	Unknown	No	MSS	0	None	0	Yes	pMMR	R	None	None	None	None
69	52	Female	Curettage	No	Ia	I	G2	8380-3	EC	No	Superficial	No	No	No	Yes	Unknown	No	No	MSI-H	1B+1D	B/D	2	Yes	dMMR	MLH1+PMS2	None	None	None	None
72	57	Female	Hysterectomy	No	Ia	I	G2	8380-3	EC	No	Superficial	Yes	No	Unknown	Unknown	Unknown	No	No	MSI-H	2B+2D	B/D	4	Yes	dMMR	PMS2	None	None	None	None
73	52	Female	Curettage	No	Ia	I	G3	8380-3	EC	No	Superficial	Yes	No	Unknown	Unknown	Unknown	Unknown	No	MSS	0	None	0	Yes	pMMR	R	None	None	None	None
74	49	Female	Curettage	No	Ia	I	G1	8380-3	EC	No	Superficial	Yes	No	Unknown	Unknown	Unknown	Unknown	No	MSS	0	None	0	Yes	pMMR	R	None	None	None	None
75	50	Female	Hysterectomy	No	Ia	I	G2	8380-3	EC	No	Superficial	Yes	No	Unknown	Unknown	Unknown	Unknown	No	MSS	0	None	0	Yes	pMMR	R	None	None	None	None
76	55	Female	Hysterectomy	No	Ib	I	G3	8380-3	EC	No	Deep	Yes	No	Unknown	Unknown	Unknown	No	No	MSI-H	2B+2D	B/D	4	Yes	dMMR	MLH1+PMS2	None	None	None	None
77	44	Female	Hysterectomy	No	IIIb	III	G3	8380-3	EC	Yes	Deep	Yes	No	Yes	Yes	Unknown	Unknown	No	MSS	0	None	0	Yes	pMMR	R	None	None	None	None
78	47	Female	Curettage	No	Ia	I	G1	8380-3	EC	No	Superficial	Yes	No	Yes	No	Unknown	Unknown	No	MSS	0	None	0	Yes	pMMR	R	None	None	None	None
79	41	Female	Curettage	No	IIIa	III	G1	8380-3	EC	No	Superficial	Yes	No	Yes	Yes	Unknown	Unknown	No	MSS	0	None	0	Yes	pMMR	R	None	None	None	None
85	44	Female	Curettage	No	Ia	I	G2	8380-3	EC	Yes	Superficial	Yes	No	Yes	Yes	Unknown	Unknown	No	MSS	0	None	0	Yes	pMMR	R	None	None	None	None
86	60	Female	Hysterectomy	No	IIIc	III	G2	8380-3	EC	Yes	Deep	Yes	Yes	Yes	Yes	Unknown	Unknown	No	MSS	0	None	0	Yes	pMMR	R	None	None	None	None
87	36	Female	Hysterectomy	No	IIIc	III	G1	8380-3	EC	Yes	Deep	Yes	Yes	Yes	Yes	Unknown	Unknown	No	MSS	0	None	0	Yes	pMMR	R	None	MSS	None	None
88	50	Female	Hysterectomy	No	IIIc	III	G3	8323-3	MC	Yes	Deep	Yes	Yes	Yes	Yes	Unknown	Unknown	No	MSS	0	None	0	Yes	pMMR	R	None	None	None	None
89	46	Female	Curettage	No	Ib	I	G3	8380-3	EC	No	Deep	Yes	No	Yes	Yes	Unknown	Unknown	No	MSS	0	None	0	Yes	pMMR	R	None	None	None	None
90	52	Female	Hysterectomy	No	IVb	IV	G3	8380-3	EC	Yes	Superficial	Yes	No	Yes	Yes	Unknown	No	No	MSI-H	2B	B	2	Yes	dMMR	MLH1+PMS2	None	None	None	None
91	82	Female	Hysterectomy	No	Ia	I	G1	8380-3	EC	No	Superficial	No	No	Unknown	Unknown	Unknown	No	No	MSI-H	2B+3D	B	5	Yes	dMMR	PMS2	None	None	None	None
92	44	Female	Hysterectomy	No	IIIa	III	G1	8380-3	EC	No	Superficial	Yes	No	Yes	Yes	Unknown	Unknown	Yes	MSS	0	None	0	Yes	pMMR	R	None	None	None	None
93	50	Female	Hysterectomy	No	Ia	I	G2	8380-3	EC	No	Superficial	Yes	No	Unknown	Unknown	Unknown	Unknown	No	MSS	0	None	0	Yes	pMMR	R	None	None	None	None
94	49	Female	Hysterectomy	No	Ia	I	G2	8380-3	EC	No	Superficial	Yes	No	Unknown	Unknown	Unknown	Unknown	No	MSS	0	None	0	Yes	pMMR	R	None	None	None	None
95	43	Female	Hysterectomy	No	Ia	I	G3	8380-3	EC	Yes	Superficial	Yes	No	Yes	Yes	Unknown	Unknown	No	MSS	0	None	0	Yes	pMMR	R	None	None	None	None
96	59	Female	Curettage	No	Ia	I	G2	8380-3	EC	No	Superficial	No	No	Yes	Yes	Unknown	No	No	MSI-H	2B	B	2	Yes	dMMR	MLH1+PMS2	None	None	None	None
97	54	Female	Hysterectomy	No	IIIc	III	G1	8380-3	EC	Yes	Superficial	Yes	Yes	Yes	Yes	Unknown	Unknown	No	MSS	0	None	0	Yes	pMMR	R	None	None	None	None
98	55	Female	Hysterectomy	No	Ib	I	G2	8380-3	EC	No	Deep	Yes	No	Unknown	Unknown	Unknown	Unknown	No	MSS	0	None	0	Yes	pMMR	R	None	None	None	None
99	58	Female	Hysterectomy	No	Ib	I	G3	8380-3	EC	Yes	Deep	Yes	No	No	Yes	Unknown	No	No	MSI-H	2B	B	2	Yes	dMMR	MSH6	None	None	None	None
100	67	Female	Hysterectomy	Yes	Ia	I	G3	8323-3	MC	Yes	Superficial	Yes	No	Yes	No	Unknown	Unknown	No	MSS	0	None	0	Yes	pMMR	R	None	None	None	None
101	54	Female	Curettage	No	IIIc	III	G1	8380-3	EC	No	Superficial	Yes	Yes	Yes	Yes	Unknown	Unknown	No	MSS	0	None	0	Yes	pMMR	R	None	None	None	None
102	60	Female	Hysterectomy	No	Ib	I	G2	8380-3	EC	No	Deep	Yes	No	Yes	Yes	Unknown	Unknown	Yes	MSS	0	None	0	Yes	pMMR	R	None	None	None	None
103	53	Female	Hysterectomy	No	Ia	I	G1	8380-3	EC	No	Superficial	Yes	No	Unknown	Unknown	Unknown	Unknown	No	MSS	0	None	0	Yes	pMMR	R	None	None	None	None
104	52	Female	Curettage	No	Ib	I	G1	8380-3	EC	No	Superficial	Yes	No	Yes	Yes	Unknown	No	Yes	MSI-H	1B+1D	B/D	2	Yes	dMMR	MLH1+PMS2	None	None	None	None
107	55	Female	Hysterectomy	Yes	Ia	I	G3	8323-3	MC	No	Superficial	Yes	No	Yes	Yes	Unknown	No	No	MSI-H	2B	B	2	Yes	dMMR	MLH1+PMS2	None	None	None	None
108	67	Female	Hysterectomy	No	Ia	I	G1	8380-3	EC	No	Superficial	Yes	No	Unknown	Unknown	Unknown	Unknown	No	MSS	0	None	0	Yes	pMMR	R	None	MSS	None	None
109	59	Female	Hysterectomy	No	IIIa	III	G1	8380-3	EC	Yes	Superficial	Yes	No	Yes	Yes	Unknown	Unknown	No	MSS	0	None	0	Yes	pMMR	R	None	None	None	None
110	53	Female	Hysterectomy	Yes	IVb	IV	G3	8441-3	SC	Yes	Deep	Yes	No	Yes	Yes	Unknown	Unknown	No	MSS	0	None	0	Yes	pMMR	R	None	None	None	None
115	44	Female	Curettage	No	Ia	I	G3	8380-3	EC	No	Superficial	Yes	No	Yes	Yes	Unknown	Unknown	No	MSS	0	None	0	Yes	pMMR	R	None	None	None	None
116	46	Female	Curettage	No	Ia	I	G1	8380-3	EC	No	Superficial	No	No	Unknown	Unknown	No	No	No	MSS	0	None	0	Yes	pMMR	R	None	MSS	None	None
118	51	Female	Curettage	No	Ia	I	G1	8380-3	EC	No	Superficial	Yes	No	Unknown	Unknown	Unknown	Unknown	No	MSS	0	None	0	Yes	pMMR	R	None	None	None	None
119	65	Female	Hysterectomy	No	Ia	I	G2	8380-3	EC	Yes	Superficial	Yes	No	Yes	Yes	Unknown	Unknown	No	MSS	0	None	0	Yes	pMMR	R	None	None	None	None
120	65	Female	Hysterectomy	No	Ia	I	G1	8380-3	EC	No	Superficial	Yes	No	Unknown	Unknown	Unknown	No	No	MSI-H	1B+1D	B/D	2	Yes	dMMR	MLH1+PMS2	None	None	None	None
125	58	Female	Hysterectomy	No	Ia	I	G3	8380-3	EC	No	Superficial	Yes	No	Unknown	Unknown	Unknown	No	No	MSI-H	2B+3D	B/D	5	Yes	dMMR	MSH2+MSH6	None	None	None	None
126	47	Female	Hysterectomy	No	Ia	I	G1	8380-3	EC	No	Superficial	Yes	No	Unknown	Unknown	Unknown	Unknown	No	MSS	0	None	0	Yes	pMMR	R	None	None	None	None
128	57	Female	Hysterectomy	No	Ia	I	G1	8380-3	EC	No	Superficial	Yes	No	Unknown	Unknown	Unknown	Unknown	No	MSS	0	None	0	Yes	pMMR	R	None	None	None	None
129	52	Female	Hysterectomy	No	Ia	I	G1	8380-3	EC	No	Superficial	Yes	No	Unknown	Unknown	Unknown	Unknown	No	MSS	0	None	0	Yes	pMMR	R	None	None	None	None
130	58	Female	Hysterectomy	No	Ib	I	G3	8380-3	EC	No	Deep	Yes	No	No	Yes	Unknown	No	No	MSI-H	1B+1D	B/D	2	Yes	dMMR	MLH1+PMS2	None	None	None	None
131	68	Female	Hysterectomy	No	Ib	I	G1	8380-3	EC	Yes	Deep	Yes	No	Yes	No	Unknown	No	No	MSI-H	2B	B	2	Yes	dMMR	MLH1+PMS2	None	None	None	None
133	50	Female	Hysterectomy	No	Ia	I	G1	8380-3	EC	Yes	Superficial	Yes	No	Unknown	Unknown	Unknown	Unknown	No	MSS	0	None	0	Yes	pMMR	R	None	None	None	None
134	50	Female	Hysterectomy	No	Ib	I	G2	8380-3	EC	No	Deep	Yes	No	Yes	Yes	Unknown	Unknown	No	MSS	0	None	0	Yes	pMMR	R	None	None	None	None
135	76	Female	Hysterectomy	No	Ib	I	G3	8380-3	EC	Yes	Deep	Yes	No	Yes	Yes	Unknown	Unknown	No	MSS	0	None	0	Yes	pMMR	R	None	None	None	None
136	45	Female	Curettage	No	Ia	I	G3	8323-3	MC	No	Superficial	Yes	No	Yes	Yes	Unknown	No	Yes	MSI-H	2B+2D	B/D	4	Yes	dMMR	MLH1+PMS2	None	None	None	None
137	39	Female	Curettage	No	Ib	I	G2	8380-3	EC	No	Deep	Yes	No	Yes	Yes	Unknown	Unknown	No	MSS	0	None	0	Yes	pMMR	R	None	None	None	None
141	65	Female	Hysterectomy	No	Ib	I	G1	8380-3	EC	Yes	Deep	Yes	No	Yes	Yes	Unknown	Unknown	No	MSS	0	None	0	Yes	pMMR	R	None	None	None	None
142	53	Female	Hysterectomy	No	II	II	G1	8380-3	EC	No	Deep	Yes	No	Yes	Yes	Unknown	No	No	MSI-H	2B	B	2	Yes	dMMR	MSH2+MSH6	None	None	None	None
143	60	Female	Hysterectomy	Yes	Ia	I	G3	8380-3	EC	Yes	Superficial	Yes	No	Yes	Yes	Unknown	Unknown	No	MSS	0	None	0	Yes	pMMR	R	None	None	None	None
144	57	Female	Curettage	No	II	II	G1	8380-3	EC	No	Superficial	Yes	No	Yes	Yes	Unknown	Unknown	Yes	MSS	0	None	0	Yes	pMMR	R	None	None	None	None
145	46	Female	Hysterectomy	No	II	II	G3	8380-3	EC	Yes	Deep	Yes	No	Yes	Yes	Unknown	No	No	MSI-H	1B+1D	B/D	2	Yes	dMMR	MLH1+PMS2	None	None	None	None
146	58	Female	Curettage	No	Ia	I	G1	8380-3	EC	No	Superficial	Yes	No	Unknown	Unknown	Unknown	Unknown	No	MSS	0	None	0	Yes	pMMR	R	None	None	None	None
147	61	Female	Hysterectomy	No	II	II	G3	8380-3	EC	No	Deep	Yes	No	Yes	No	Unknown	Unknown	No	MSS	0	None	0	Yes	pMMR	R	None	None	None	None
151	58	Female	Curettage	No	Ia	I	G1	8380-3	EC	No	Superficial	Yes	No	Unknown	Unknown	Unknown	Unknown	No	MSS	0	None	0	Yes	pMMR	R	None	None	None	None
152	35	Female	Hysterectomy	No	Ia	I	G3	8380-3	EC	No	Superficial	Yes	No	Unknown	Unknown	Unknown	Unknown	No	MSS	0	None	0	Yes	pMMR	R	None	None	None	None
153	56	Female	Hysterectomy	Yes	II	II	G3	8380-3	EC	Yes	Superficial	Yes	No	Yes	Yes	No	No	No	MSI-L	1B	B	1	No	dMMR	MSH6	MSI-L(Mono27)	MSI-H	MSH6	MMRd-p53abn
154	57	Female	Hysterectomy	No	IVb	IV	G3	8323-3	MC	Yes	Deep	Yes	Yes	Yes	Yes	Unknown	Unknown	No	MSS	0	None	0	Yes	pMMR	R	None	None	None	None
155	53	Female	Hysterectomy	No	IIIa	III	G1	8380-3	EC	No	Superficial	Yes	No	Yes	Yes	Unknown	Unknown	No	MSS	0	None	0	Yes	pMMR	R	None	None	None	None
156	57	Female	Curettage	Yes	Ia	I	G3	8323-3	MC	No	Superficial	Yes	No	Yes	Yes	Unknown	Unknown	No	MSS	0	None	0	Yes	pMMR	R	None	None	None	None
160	71	Female	Hysterectomy	No	IIIa	III	G1	8380-3	EC	No	Deep	Yes	No	Unknown	Unknown	Unknown	Unknown	No	MSS	0	None	0	Yes	pMMR	R	None	None	None	None
161	50	Female	Hysterectomy	No	II	II	G3	8380-3	EC	No	Deep	Yes	No	Yes	Yes	Unknown	No	No	MSI-H	2B+3D	B/D	5	Yes	dMMR	MSH2+MSH6	None	None	None	None
162	60	Female	Curettage	No	Ia	I	G1	8380-3	EC	No	Superficial	Yes	No	Unknown	Unknown	Unknown	Unknown	No	MSS	0	None	0	Yes	pMMR	R	None	None	None	None
163	52	Female	Hysterectomy	No	IIIc	III	G3	8380-3	EC	Yes	Deep	Yes	Yes	Yes	Yes	Unknown	Unknown	No	MSS	0	None	0	Yes	pMMR	R	None	None	None	None
164	53	Female	Hysterectomy	No	Ia	I	G1	8380-3	EC	No	Superficial	Yes	No	Unknown	Unknown	Unknown	No	No	MSI-H	2B+2D	B/D	4	Yes	dMMR	MSH2+MSH6	None	None	None	None
166	46	Female	Curettage	No	Ia	I	G1	8380-3	EC	No	Superficial	Yes	No	Unknown	Unknown	Unknown	No	No	MSI-H	2B+3D	B/D	5	Yes	dMMR	MSH2+MSH6	None	None	None	None
167	54	Female	Curettage	No	Ia	I	G3	8380-3	EC	No	Superficial	Yes	No	Yes	No	Unknown	No	No	MSI-H	2B+1D	B/D	3	Yes	dMMR	MSH2+MSH6	None	None	None	None
169	54	Female	Curettage	No	Ia	I	G1	8380-3	EC	No	Superficial	Yes	No	Unknown	Unknown	Unknown	Unknown	No	MSS	0	None	0	Yes	pMMR	R	None	None	None	None
171	80	Female	Hysterectomy	No	Ib	I	G1	8380-3	EC	No	Deep	No	No	Yes	Yes	Unknown	Unknown	No	MSS	0	None	0	Yes	pMMR	R	None	None	None	None
172	53	Female	Hysterectomy	No	IIIb	III	G2	8380-3	EC	No	Deep	Yes	No	Yes	Yes	Unknown	Unknown	No	MSS	0	None	0	Yes	pMMR	R	None	None	None	None
175	57	Female	Curettage	No	Ib	I	G1	8380-3	EC	Yes	Superficial	Yes	No	Yes	Yes	Unknown	Unknown	No	MSS	0	None	0	Yes	pMMR	R	None	None	None	None
176	48	Female	Hysterectomy	Yes	IVb	IV	G3	8323-3	MC	No	Deep	Yes	Yes	Yes	Yes	Unknown	Unknown	No	MSS	0	None	0	Yes	pMMR	R	None	None	None	None
178	36	Female	Hysterectomy	No	IIIc	III	G2	8380-3	EC	Yes	Deep	Yes	Yes	Yes	Yes	Unknown	Unknown	No	MSS	0	None	0	Yes	pMMR	R	None	None	None	None
179	73	Female	Hysterectomy	No	Ib	I	G1	8380-3	EC	Yes	Deep	Yes	No	Yes	Yes	Unknown	Unknown	No	MSS	0	None	0	Yes	pMMR	R	None	None	None	None
181	68	Female	Hysterectomy	No	IIIa	III	G1	8380-3	EC	Yes	Superficial	Yes	No	Yes	Yes	Unknown	Unknown	No	MSS	0	None	0	Yes	pMMR	R	None	None	None	None
182	35	Female	Hysterectomy	No	IIIc	III	G3	8380-3	EC	No	Superficial	Yes	No	Yes	Yes	Unknown	Unknown	No	MSS	0	None	0	Yes	pMMR	R	None	None	None	None
183	46	Female	Hysterectomy	No	Ia	I	G1	8380-3	EC	No	Superficial	Yes	No	No	Yes	Unknown	Unknown	No	MSS	0	None	0	Yes	pMMR	R	None	None	None	None
185	51	Female	Curettage	No	Ia	I	G1	8380-3	EC	No	Superficial	Yes	No	Unknown	Unknown	Unknown	Unknown	No	MSS	0	None	0	Yes	pMMR	R	None	None	None	None
186	56	Female	Hysterectomy	No	Ia	I	G3	8980-3	CS	No	Superficial	Yes	No	Yes	Yes	Unknown	Unknown	No	MSS	0	None	0	Yes	pMMR	R	None	None	None	None
187	47	Female	Hysterectomy	No	Ia	I	G1	8380-3	EC	No	Superficial	Yes	No	Unknown	Unknown	Unknown	Unknown	No	MSS	0	None	0	Yes	pMMR	R	None	None	None	None
188	52	Female	Hysterectomy	No	II	II	G3	8380-3	EC	No	Superficial	Yes	No	Yes	No	Unknown	Unknown	Yes	MSS	0	None	0	Yes	pMMR	R	None	None	None	None
189	85	Female	Hysterectomy	Yes	Ia	I	G3	8441-3	SC	Yes	Superficial	No	No	Yes	Yes	Unknown	Unknown	No	MSS	0	None	0	Yes	pMMR	R	None	None	None	None
190	49	Female	Hysterectomy	Yes	Ia	I	G2	8380-3	EC	No	Superficial	Yes	No	Yes	No	Unknown	Unknown	No	MSS	0	None	0	Yes	pMMR	R	None	None	None	None
191	67	Female	Hysterectomy	Yes	Ia	I	G3	8441-3	SC	No	Superficial	No	No	Yes	No	Unknown	Unknown	No	MSS	0	None	0	Yes	pMMR	R	None	None	None	None
196	58	Female	Curettage	No	Ib	I	G1	8380-3	EC	Yes	Deep	Yes	No	Yes	No	Unknown	Unknown	No	MSS	0	None	0	Yes	pMMR	R	None	None	None	None
199	64	Female	Curettage	No	Ia	I	G2	8380-3	EC	Yes	Superficial	Yes	No	Unknown	Unknown	Unknown	Unknown	No	MSS	0	None	0	Yes	pMMR	R	None	None	None	None
204	52	Female	Hysterectomy	No	Ib	I	G2	8380-3	EC	Yes	Deep	Yes	No	Yes	Yes	Unknown	Unknown	No	MSS	0	None	0	Yes	pMMR	R	None	None	None	None
206	53	Female	Hysterectomy	Yes	IIIc	III	G3	8441-3	SC	Yes	Deep	Yes	Yes	Yes	No	Unknown	Unknown	No	MSS	0	None	0	Yes	pMMR	R	None	None	None	None
207	37	Female	Curettage	No	IIIa	III	G1	8380-3	EC	No	Superficial	Yes	No	Yes	Yes	Unknown	Unknown	No	MSS	0	None	0	Yes	pMMR	R	None	None	None	None
208	56	Female	Curettage	Yes	II	II	G3	8441-3	SC	No	Superficial	Yes	No	Yes	Yes	Unknown	No	No	MSI-H	2B	B	2	Yes	dMMR	MSH2+MSH6	None	None	None	None
209	33	Female	Hysterectomy	No	Ib	I	G2	8380-3	EC	No	Superficial	Yes	No	Unknown	Unknown	Unknown	Unknown	No	MSS	0	None	0	Yes	pMMR	R	None	None	None	None
210	51	Female	Hysterectomy	Yes	IIIc	III	G3	8441-3	SC	Yes	Deep	Yes	Yes	Yes	Yes	Unknown	Unknown	No	MSS	0	None	0	Yes	pMMR	R	None	None	None	None
211	59	Female	Curettage	No	Ia	I	G1	8380-3	EC	No	Superficial	No	No	Unknown	Unknown	Unknown	Unknown	No	MSS	0	None	0	Yes	pMMR	R	None	None	None	None
212	51	Female	Hysterectomy	No	Ia	I	G1	8380-3	EC	No	Superficial	Yes	No	Unknown	Unknown	Unknown	Unknown	No	MSS	0	None	0	Yes	pMMR	R	None	None	None	None
213	50	Female	Hysterectomy	No	Ia	I	G1	8380-3	EC	No	Superficial	Yes	No	Yes	No	Unknown	Unknown	No	MSS	0	None	0	Yes	pMMR	R	None	None	None	None
218	47	Female	Hysterectomy	No	IIIc	III	G2	8380-3	EC	Yes	Deep	Yes	Yes	Yes	Yes	Unknown	Unknown	No	MSS	0	None	0	Yes	pMMR	R	None	None	None	None
219	59	Female	Hysterectomy	No	Ia	I	G1	8380-3	EC	Yes	Superficial	Yes	No	Yes	Yes	Unknown	Unknown	No	MSS	0	None	0	Yes	pMMR	R	None	None	None	None
220	48	Female	Hysterectomy	No	II	II	G1	8380-3	EC	No	Superficial	Yes	No	Yes	Yes	Unknown	Unknown	Yes	MSS	0	None	0	Yes	pMMR	R	None	None	None	None
221	79	Female	Hysterectomy	No	Ib	I	G1	8380-3	EC	No	Deep	No	No	Yes	Yes	Unknown	Unknown	No	MSS	0	None	0	Yes	pMMR	R	None	None	None	None
222	56	Female	Curettage	No	Ia	I	G1	8380-3	EC	Yes	Superficial	Yes	No	Yes	Yes	Unknown	No	No	MSI-H	2B+1D	B/D	3	Yes	dMMR	MSH2+MSH6	None	None	None	None
224	52	Female	Hysterectomy	Yes	Ia	I	G3	8380-3	EC	No	Superficial	Yes	No	Unknown	Unknown	Unknown	Unknown	No	MSS	0	None	0	Yes	pMMR	R	None	None	None	None
225	59	Female	Curettage	No	Ia	I	G2	8380-3	EC	Yes	Superficial	Yes	No	Yes	Yes	Unknown	Unknown	No	MSS	0	None	0	Yes	pMMR	R	None	None	None	None
#4	57	Female	Hysterectomy	No	Ia	I	G1	8380-3	EC	Yes	Superficial	Yes	No	No	No	Unknown	Unknown	No	MSS	0	None	0	Yes	pMMR	R	None	None	None	None
#5	56	Female	Hysterectomy	No	Ia	I	G2	8380-3	EC	Yes	Superficial	Yes	No	Yes	Yes	Unknown	Unknown	No	MSS	0	None	0	Yes	pMMR	R	None	None	None	None
#6	67	Female	Hysterectomy	Yes	Ia	I	G3	8980-3	CS	Yes	Superficial	Yes	No	Yes	Yes	Unknown	No	No	MSI-H	2B	B	2	Yes	dMMR	MSH2+MSH6	None	None	None	None
#7	56	Female	Curettage	No	IIIa	III	G3	8441-3	SC	No	Superficial	Yes	No	Yes	Yes	Unknown	Unknown	Yes	MSS	0	None	0	Yes	pMMR	R	None	None	None	None
#10	48	Female	Curettage	No	Ia	I	G2	8380-3	EC	No	Superficial	Yes	No	No	No	Unknown	Unknown	No	MSS	0	None	0	Yes	pMMR	R	None	None	None	None
#11	71	Female	Hysterectomy	No	Ia	I	G1	8380-3	EC	No	Superficial	Yes	No	No	No	Unknown	Unknown	No	MSS	0	None	0	Yes	pMMR	R	None	None	None	None
#14	51	Female	Hysterectomy	No	Ib	I	G2	8380-3	EC	Yes	Deep	Yes	No	Yes	Yes	Unknown	No	No	MSI-H	2B	B	2	Yes	dMMR	MLH1+PMS2	None	None	None	None
#15	48	Female	Hysterectomy	No	Ia	I	G1	8380-3	EC	No	Superficial	Yes	No	Unknown	Unknown	Yes	Yes	Yes	MSS	0	None	0	No	dMMR	MSH2+MSH6	MSS	MSS	MSH6	MMRd
#16	51	Female	Hysterectomy	No	IIIb	III	G3	8020-3	UC	Yes	Deep	Yes	No	Yes	Yes	Unknown	Unknown	No	MSS	0	None	0	Yes	pMMR	R	None	None	None	None
#17	54	Female	Hysterectomy	No	Ia	I	G1	8380-3	EC	No	Superficial	Yes	No	Unknown	Unknown	Unknown	Unknown	No	MSS	0	None	0	Yes	pMMR	R	None	None	None	None
#19	60	Female	Curettage	No	Ia	I	G2	8380-3	EC	Yes	Superficial	Yes	No	Yes	Yes	Unknown	No	No	MSI-H	2B	B	2	Yes	dMMR	MLH1+PMS2	None	None	None	None
227	50	Female	Curettage	No	Ia	I	G1	8380-3	EC	No	Superficial	Yes	No	Yes	Yes	Unknown	Unknown	No	MSS	0	None	0	Yes	pMMR	R	None	None	None	None
228	58	Female	Curettage	No	Ia	I	G3	8310-3	CC	Yes	Superficial	Yes	No	Yes	Yes	Unknown	No	No	MSI-H	2B+1D	B/D	3	Yes	dMMR	MSH6	None	None	None	None
229	52	Female	Hysterectomy	Yes	IIIc	III	G3	8323-3	MC	No	Deep	Yes	Yes	Yes	Yes	Unknown	Unknown	No	MSS	0	None	0	Yes	pMMR	R	None	None	None	None
230	48	Female	Curettage	No	Ia	I	G1	8380-3	EC	No	Superficial	Yes	No	Unknown	Unknown	Unknown	Unknown	No	MSS	0	None	0	Yes	pMMR	R	None	None	None	None
231	68	Female	Hysterectomy	No	Ib	I	G2	8380-3	EC	No	Deep	Yes	No	Yes	Yes	Unknown	Unknown	No	MSS	0	None	0	Yes	pMMR	R	None	None	None	None
239	54	Female	Curettage	No	Ib	I	G1	8380-3	EC	No	Deep	No	No	Yes	Yes	Unknown	Unknown	Yes	MSS	0	None	0	Yes	pMMR	R	None	None	None	None
240	48	Female	Curettage	No	Ia	I	G1	8380-3	EC	No	Superficial	No	No	No	No	Unknown	Unknown	No	MSS	0	None	0	Yes	pMMR	R	None	None	None	None
241	65	Female	Hysterectomy	No	Ia	I	G2	8380-3	EC	No	Superficial	Yes	No	Unknown	Unknown	Unknown	Unknown	No	MSS	0	None	0	Yes	pMMR	R	None	None	None	None
242	68	Female	Hysterectomy	No	Ia	I	G2	8380-3	EC	No	Superficial	Yes	No	Unknown	Unknown	Unknown	Unknown	No	MSS	0	None	0	Yes	pMMR	R	None	None	None	None
243	65	Female	Curettage	No	Ia	I	G1	8380-3	EC	No	Superficial	Yes	No	Unknown	Unknown	Unknown	Unknown	No	MSS	0	None	0	Yes	pMMR	R	None	None	None	None
244	53	Female	Curettage	No	Ia	I	G1	8380-3	EC	No	Superficial	Yes	No	Unknown	Unknown	Unknown	Unknown	No	MSS	0	None	0	Yes	pMMR	R	None	None	None	None
245	59	Female	Hysterectomy	No	Ia	I	G1	8380-3	EC	No	Superficial	Yes	No	Unknown	Unknown	Unknown	No	No	MSI-H	2B+2D	B/D	4	Yes	dMMR	MLH1+PMS2	None	None	None	None
246	64	Female	Hysterectomy	No	Ia	I	G1	8380-3	EC	No	Superficial	Yes	No	Unknown	Unknown	Unknown	Unknown	No	MSS	0	None	0	Yes	pMMR	R	None	None	None	None
247	59	Female	Curettage	No	Ia	I	G1	8380-3	EC	No	Superficial	Yes	No	Yes	No	Unknown	Unknown	No	MSS	0	None	0	Yes	pMMR	R	None	None	None	None
248	63	Female	Curettage	No	Ia	I	G1	8380-3	EC	No	Superficial	Yes	No	Yes	Yes	Unknown	Unknown	No	MSS	0	None	0	Yes	pMMR	R	None	None	None	None
249	51	Female	Curettage	No	IIIc	III	G3	8020-3	UC	Yes	Deep	Yes	Yes	Unknown	Unknown	Unknown	Unknown	No	MSS	0	None	0	Yes	pMMR	R	None	None	None	None
250	46	Female	Curettage	No	Ia	I	G1	8380-3	EC	No	Superficial	Yes	No	Unknown	Unknown	Unknown	Unknown	No	MSS	0	None	0	Yes	pMMR	R	None	None	None	None
251	53	Female	Hysterectomy	No	Ia	I	G1	8380-3	EC	No	Superficial	Yes	No	Unknown	Unknown	Unknown	Unknown	No	MSS	0	None	0	Yes	pMMR	R	None	None	None	None
252	51	Female	Hysterectomy	No	Ia	I	G1	8380-3	EC	No	Superficial	No	No	Unknown	Unknown	Unknown	No	Yes	MSI-H	2B+2D	B/D	4	Yes	dMMR	MLH1+PMS2	None	None	None	None
253	55	Female	Hysterectomy	No	II	II	G3	8380-3	EC	No	Superficial	Yes	No	Unknown	Unknown	Unknown	No	No	MSI-H	2D	D	2	Yes	dMMR	MLH1+PMS2	None	None	None	None
254	49	Female	Hysterectomy	No	IIIc	III	G3	8020-3	UC	Yes	Deep	Yes	Yes	Yes	Yes	Unknown	No	Yes	MSI-H	2B	B	2	Yes	dMMR	MSH2+MSH6	None	None	None	None
255	50	Female	Hysterectomy	No	Ia	I	G1	8380-3	EC	No	Superficial	Yes	No	Unknown	Unknown	Unknown	Unknown	No	MSS	0	None	0	Yes	pMMR	R	None	None	None	None
260	51	Female	Curettage	No	Ib	I	G1	8380-3	EC	No	Deep	Yes	No	Yes	Yes	Unknown	Unknown	No	MSS	0	None	0	Yes	pMMR	R	None	None	None	None
261	46	Female	Curettage	Yes	II	II	G2	8380-3	EC	No	Superficial	Yes	No	Yes	Yes	Unknown	Unknown	No	MSS	0	None	0	Yes	pMMR	R	None	None	None	None
262	69	Female	Hysterectomy	No	Ia	I	G1	8380-3	EC	No	Superficial	Yes	No	Yes	Yes	Unknown	Unknown	No	MSS	0	None	0	Yes	pMMR	R	None	None	None	None
265	52	Female	Hysterectomy	No	II	II	G1	8380-3	EC	No	Superficial	Yes	No	Yes	Yes	Unknown	Unknown	No	MSS	0	None	0	Yes	pMMR	R	None	None	None	None
266	68	Female	Curettage	No	Ia	I	G2	8380-3	EC	No	Superficial	No	No	Yes	Yes	Unknown	Unknown	No	MSS	0	None	0	Yes	pMMR	R	None	None	None	None
271	48	Female	Hysterectomy	No	Ia	I	G2	8380-3	EC	No	Superficial	Yes	No	Yes	Yes	Unknown	Unknown	No	MSS	0	None	0	Yes	pMMR	R	None	None	None	None
272	52	Female	Hysterectomy	No	IIIa	III	G1	8380-3	EC	No	Superficial	Yes	No	Unknown	Unknown	Unknown	Unknown	No	MSS	0	None	0	Yes	pMMR	R	None	None	None	None
273	58	Female	Hysterectomy	No	Ib	I	G2	8380-3	EC	No	Deep	Yes	No	Yes	Yes	Unknown	Unknown	No	MSS	0	None	0	Yes	pMMR	R	None	None	None	None
274	50	Female	Hysterectomy	No	IIIc	III	G3	8323-3	MC	No	Deep	Yes	Yes	Unknown	Unknown	Unknown	No	No	MSI-H	2B	B	2	Yes	dMMR	MSH6	None	None	None	None
277	53	Female	Curettage	No	Ia	I	G1	8380-3	EC	No	Superficial	No	No	Unknown	Unknown	Unknown	Unknown	Unknown	MSS	0	None	0	Yes	pMMR	R	None	None	None	None
280	74	Female	Curettage	No	Ia	I	G1	8380-3	EC	No	Superficial	Yes	No	Unknown	Unknown	No	No	No	MSI-H	2B	B	2	Yes	dMMR	MLH1+PMS2	None	None	None	None
281	54	Female	Curettage	No	Ia	I	G1	8380-3	EC	No	Superficial	Yes	No	Unknown	Unknown	Unknown	No	Yes	MSI-H	2B+2D	B/D	4	Yes	dMMR	MLH1+PMS2	None	None	None	None
282	50	Female	Curettage	No	Ia	I	G1	8380-3	EC	No	Superficial	No	No	Unknown	Unknown	Unknown	No	No	MSS	0	None	0	Yes	pMMR	R	None	None	None	None
283	59	Female	Curettage	No	Ia	I	G1	8380-3	EC	No	Superficial	No	No	Unknown	Unknown	Unknown	No	No	MSS	0	None	0	Yes	pMMR	R	None	None	None	None
284	53	Female	Curettage	No	Ia	I	G1	8380-3	EC	No	Superficial	No	No	Unknown	Unknown	Unknown	No	No	MSI-H	2B+2D	B/D	4	Yes	dMMR	MLH1+PMS2	None	None	None	None
286	63	Female	Hysterectomy	No	IIIc	III	G3	8380-3	EC	Yes	Deep	Yes	Yes	Unknown	Unknown	Unknown	No	No	MSS	0	None	0	Yes	pMMR	R	None	None	None	None
287	51	Female	Hysterectomy	No	Ia	I	G2	8380-3	EC	No	Superficial	No	No	Unknown	Unknown	Unknown	No	No	MSS	0	None	0	Yes	pMMR	R	None	None	None	None
288	54	Female	Hysterectomy	No	IVb	IV	G2	8380-3	EC	Yes	Deep	Yes	Yes	Unknown	Unknown	Unknown	No	No	MSS	0	None	0	Yes	pMMR	R	None	None	None	None
289	53	Female	Curettage	No	Ia	I	G3	8980-3	CS	No	Superficial	Yes	No	Yes	Yes	Unknown	No	No	MSI-H	2B	B	2	Yes	dMMR	MLH1+PMS2	None	None	None	None
290	56	Female	Hysterectomy	Yes	IIIc	III	G3	8380-3	EC	Yes	Deep	Yes	Yes	Unknown	Unknown	Unknown	No	No	MSS	0	None	0	Yes	pMMR	R	None	None	None	None
297	54	Female	Hysterectomy	No	Ia	I	G1	8380-3	EC	No	Superficial	Yes	No	Unknown	Unknown	Unknown	No	No	MSS	0	None	0	Yes	pMMR	R	None	None	None	None
298	48	Female	Hysterectomy	No	Ia	I	G3	8310-3	CC	No	Superficial	No	No	Yes	Yes	Unknown	No	No	MSS	0	None	0	Yes	pMMR	R	None	None	None	None
299	54	Female	Curettage	No	Ia	I	G1	8380-3	EC	No	Superficial	No	No	Unknown	Unknown	Unknown	No	No	MSI-H	1B+1D	B/D	2	Yes	dMMR	MLH1+PMS2	None	None	None	None
302	57	Female	Curettage	No	Ib	I	G3	8980-3	CS	Yes	Deep	Yes	No	Yes	Yes	Unknown	No	No	MSS	0	None	0	Yes	pMMR	R	None	None	None	None
303	25	Female	Hysterectomy	No	Ia	I	G1	8980-3	EC	No	Superficial	No	No	Unknown	Unknown	Unknown	No	No	MSS	0	None	0	Yes	pMMR	R	None	None	None	None
305	58	Female	Hysterectomy	No	IIIc	III	G2	8380-3	EC	Yes	Deep	Yes	Yes	Unknown	Unknown	Unknown	No	No	MSS	0	None	0	Yes	pMMR	R	None	None	None	None
307	55	Female	Curettage	No	Ia	I	G1	8380-3	EC	No	Superficial	Yes	No	Unknown	Unknown	Unknown	No	No	MSI-H	2B	B	2	Yes	dMMR	MLH1+PMS2	None	None	None	None
310	53	Female	Hysterectomy	No	Ia	I	G1	8380-3	EC	No	Superficial	Yes	No	Unknown	Unknown	Unknown	No	No	MSS	0	None	0	Yes	pMMR	R	None	None	None	None
311	53	Female	Hysterectomy	No	Ia	I	G1	8380-3	EC	No	Superficial	Yes	No	Unknown	Unknown	Unknown	No	No	MSS	0	None	0	Yes	pMMR	R	None	None	None	None
314	34	Female	Hysterectomy	No	Ia	I	G1	8380-3	EC	No	Superficial	No	No	Unknown	Unknown	Unknown	Unknown	Unknown	MSS	0	None	0	Yes	pMMR	R	None	None	None	None
315	54	Female	Curettage	Yes	Ia	I	G2	8380-3	EC	No	Superficial	Yes	No	Unknown	Unknown	Unknown	Unknown	Unknown	MSS	0	None	0	Yes	pMMR	R	None	None	None	None
319	52	Female	Hysterectomy	No	Ia	I	G1	8380-3	EC	No	Superficial	Yes	No	Unknown	Unknown	Unknown	Unknown	Unknown	MSS	0	None	0	Yes	pMMR	R	None	None	None	None
322	69	Female	Hysterectomy	Yes	Ib	I	G3	8323-3	MC	Yes	Deep	Yes	No	Unknown	Unknown	Unknown	Unknown	Unknown	MSI-H	2B+1D	B/D	3	Yes	dMMR	MLH1+PMS2	None	None	None	None
325	61	Female	Hysterectomy	No	Ia	I	G3	8323-3	MC	No	Superficial	Yes	No	Unknown	Unknown	Unknown	Unknown	Unknown	MSI-H	2B	B	2	Yes	dMMR	MSH6	None	None	None	None
326	53	Female	Curettage	Yes	Ia	I	G3	8380-3	EC	No	Superficial	No	No	Unknown	Unknown	Unknown	Unknown	Unknown	MSS	0	None	0	Yes	pMMR	R	None	None	None	None
328	56	Female	Curettage	No	Ia	I	G3	8380-3	EC	No	Superficial	Yes	No	Unknown	Unknown	Unknown	Unknown	Unknown	MSS	0	None	0	Yes	pMMR	R	None	None	None	None
329	54	Female	Hysterectomy	No	Ia	I	G1	8380-3	EC	No	Superficial	No	No	Unknown	Unknown	Unknown	Unknown	Unknown	MSI-H	2B+1D	B/D	3	Yes	dMMR	MSH6	None	None	None	None
334	66	Female	Hysterectomy	No	Ia	I	G1	8380-3	EC	No	Superficial	Yes	No	Unknown	Unknown	Unknown	Unknown	Unknown	MSS	0	None	0	Yes	pMMR	R	None	None	None	None
337	51	Female	Curettage	No	Ia	I	G1	8380-3	EC	No	Superficial	Yes	No	Unknown	Unknown	Unknown	Unknown	Unknown	MSS	0	None	0	Yes	pMMR	R	None	None	None	None
338	39	Female	Hysterectomy	Yes	Ia	I	G3	8310-3	CC	No	Superficial	Yes	No	Unknown	Unknown	Unknown	Unknown	Unknown	MSS	0	None	0	Yes	pMMR	R	None	None	None	None
340	52	Female	Curettage	No	Ia	I	G1	8380-3	EC	No	Superficial	Yes	No	Unknown	Unknown	Unknown	Unknown	Unknown	MSS	0	None	0	Yes	pMMR	R	None	None	None	None
341	52	Female	Curettage	No	Ia	I	G1	8380-3	EC	No	Superficial	No	No	Unknown	Unknown	Unknown	Unknown	Unknown	MSS	0	None	0	Yes	pMMR	R	None	None	None	None
342	54	Female	Curettage	No	Ib	I	G2	8380-3	EC	No	Deep	Yes	No	Unknown	Unknown	Unknown	Unknown	Unknown	MSI-L	1D	D	1	Yes	pMMR	R	None	None	None	None
347	66	Female	Hysterectomy	No	IIIc	III	G3	9111-3	MLA	Yes	Deep	Yes	Yes	Unknown	Unknown	Unknown	Unknown	Unknown	MSS	0	None	0	Yes	pMMR	R	None	None	None	None
348	46	Female	Hysterectomy	No	IIIc	III	G1	8380-3	EC	Yes	Deep	No	Yes	Unknown	Unknown	Unknown	Unknown	Unknown	MSS	0	None	0	Yes	pMMR	R	None	None	None	None
350	58	Female	Curettage	No	Ia	I	G1	8380-3	EC	No	Superficial	Yes	No	Unknown	Unknown	Unknown	Unknown	Unknown	MSS	0	None	0	Yes	pMMR	R	None	None	None	None
356	49	Female	Hysterectomy	No	Ia	I	G2	8380-3	EC	Yes	Superficial	Yes	No	Unknown	Unknown	Unknown	Unknown	Unknown	MSS	0	None	0	Yes	pMMR	R	None	None	None	None
357	50	Female	Hysterectomy	No	Ia	I	G1	8380-3	EC	No	Superficial	Yes	No	Unknown	Unknown	Unknown	Unknown	Unknown	MSS	0	None	0	Yes	pMMR	R	None	None	None	None
358	34	Female	Curettage	Yes	Ia	I	G2	8380-3	EC	No	Superficial	Yes	No	Unknown	Unknown	Unknown	No	No	MSS	0	None	0	Yes	pMMR	R	None	None	None	None
359	55	Female	Hysterectomy	No	Ib	I	G2	8380-3	EC	Yes	Deep	Yes	No	Yes	Yes	Unknown	No	No	MSS	0	None	0	Yes	pMMR	R	None	None	None	None
360	40	Female	Hysterectomy	No	Ia	I	G1	8380-3	EC	No	Superficial	Yes	No	Unknown	Unknown	Unknown	Unknown	Unknown	MSS	0	None	0	Yes	pMMR	R	None	None	None	None
361	26	Female	Curettage	No	Ia	I	G1	8380-3	EC	No	Superficial	Yes	No	Unknown	Unknown	Unknown	Unknown	Unknown	MSS	0	None	0	Yes	pMMR	R	None	None	None	None
362	37	Female	Hysterectomy	No	Ia	I	G2	8380-3	EC	No	Superficial	No	No	Unknown	Unknown	Unknown	Unknown	Unknown	MSS	0	None	0	Yes	pMMR	R	None	None	None	None
363	75	Female	Curettage	No	Ia	I	G2	8380-3	EC	No	Superficial	Yes	No	Unknown	Unknown	Unknown	Unknown	Unknown	MSS	0	None	0	Yes	pMMR	R	None	None	None	None
364	49	Female	Hysterectomy	No	Ib	I	G1	8380-3	EC	No	Deep	Yes	No	Unknown	Unknown	Unknown	Unknown	Unknown	MSS	0	None	0	Yes	pMMR	R	None	None	None	None
365	32	Female	Curettage	No	IIIc	III	G1	8380-3	EC	Yes	Deep	Yes	Yes	Unknown	Unknown	Unknown	Unknown	Unknown	MSI-L	1D	D	1	Yes	pMMR	R	None	None	None	None
367	49	Female	Hysterectomy	No	Ib	I	G2	8380-3	EC	No	Deep	Yes	No	Unknown	Unknown	Unknown	Unknown	Unknown	MSS	0	None	0	Yes	pMMR	R	None	None	None	None
378	54	Female	Curettage	No	Ia	I	G2	8380-3	EC	No	Superficial	Yes	No	Unknown	Unknown	Unknown	Unknown	Unknown	MSS	0	None	0	Yes	pMMR	R	None	None	None	None
379	54	Female	Hysterectomy	No	IIIa	III	G3	8380-3	EC	Yes	Deep	Yes	No	Unknown	Unknown	Unknown	Unknown	Unknown	MSI-H	2D	D	2	Yes	dMMR	MLH1+PMS2	None	None	None	None
380	48	Female	Hysterectomy	No	Ia	I	G1	8380-3	EC	No	Superficial	Yes	No	Yes	Unknown	Unknown	No	Yes	MSS	0	None	0	Yes	pMMR	R	None	None	None	None
381	33	Female	Hysterectomy	No	Ia	I	G1	8380-3	EC	No	Superficial	No	No	Unknown	Unknown	Unknown	Unknown	Unknown	MSS	0	None	0	Yes	pMMR	R	None	None	None	None
382	52	Female	Curettage	No	Ia	I	G1	8380-3	EC	No	Superficial	No	No	Unknown	Unknown	Unknown	Unknown	Unknown	MSS	0	None	0	Yes	pMMR	R	None	None	None	None
383	66	Female	Hysterectomy	No	Ia	I	G1	8380-3	EC	No	Superficial	Yes	No	Unknown	Unknown	Unknown	Unknown	Unknown	MSS	0	None	0	Yes	pMMR	R	None	None	None	None
385	29	Female	Hysterectomy	No	IVb	IV	G1	8380-3	EC	No	Superficial	Yes	No	Unknown	Unknown	Unknown	Unknown	Unknown	MSS	0	None	0	Yes	pMMR	R	None	None	None	None
386	53	Female	Curettage	No	Ia	I	G1	8380-3	EC	No	Superficial	Yes	No	Unknown	Unknown	Unknown	Unknown	Unknown	MSI-H	2B+1D	B/D	3	Yes	dMMR	MLH1+PMS2	None	None	None	None
387	44	Female	Curettage	No	Ia	I	G1	8380-3	EC	No	Superficial	Yes	No	Unknown	Unknown	Unknown	Unknown	Unknown	MSI-H	1B+1D	B/D	2	Yes	dMMR	MSH2+MSH6	None	None	None	None
388	56	Female	Hysterectomy	No	Ia	I	G3	8323-3	MC	No	Superficial	Yes	No	Unknown	Unknown	Unknown	Unknown	Unknown	MSS	0	None	0	Yes	pMMR	R	None	None	None	None
389	52	Female	Hysterectomy	No	IIIc	III	G3	8323-3	MC	Yes	Superficial	Yes	Yes	Yes	Unknown	Unknown	No	No	MSI-H	2B	B	2	Yes	dMMR	MSH2+MSH6	None	None	None	None
390	37	Female	Hysterectomy	No	Ia	I	G2	8380-3	EC	No	Superficial	Yes	No	Unknown	Unknown	Unknown	No	No	MSS	0	None	0	Yes	pMMR	R	None	None	None	None
391	69	Female	Curettage	No	Ib	I	G1	8380-3	EC	Yes	Deep	Yes	No	Unknown	Yes	Unknown	No	No	MSS	0	None	0	Yes	pMMR	R	None	None	None	None
392	54	Female	Curettage	No	II	II	G1	8380-3	EC	No	Superficial	No	No	Unknown	Yes	Unknown	Unknown	Unknown	MSI-H	2B+2D	B/D	4	Yes	dMMR	MLH1+PMS2	None	None	None	None
393	43	Female	Curettage	No	Ia	I	G1	8380-3	EC	No	Superficial	No	No	Unknown	Unknown	Unknown	Unknown	Unknown	MSS	0	None	0	Yes	pMMR	R	None	None	None	None
396	65	Female	Hysterectomy	Yes	Ib	I	G3	8020-3	UC	No	Deep	Yes	No	Unknown	Unknown	Unknown	Unknown	Unknown	MSI-H	2B+1D	B/D	3	Yes	dMMR	MLH1+PMS2	None	None	None	None
397	48	Female	Hysterectomy	No	Ia	I	G1	8380-3	EC	No	Superficial	Yes	No	Unknown	Unknown	Unknown	Unknown	Unknown	MSS	0	None	0	Yes	pMMR	R	None	None	None	None
401	38	Female	Curettage	No	Ia	I	G1	8380-3	EC	No	Superficial	No	No	Yes	Yes	Unknown	Unknown	Unknown	MSS	0	None	0	Yes	pMMR	R	None	None	None	None
405	68	Female	Hysterectomy	No	Ib	I	G2	8380-3	EC	No	Deep	Yes	No	Unknown	Unknown	Unknown	No	No	MSS	0	None	0	Yes	pMMR	R	None	None	None	None
408	60	Female	Hysterectomy	No	Ia	I	G2	8380-3	EC	Yes	Superficial	Yes	No	Yes	Yes	Unknown	No	No	MSS	0	None	0	Yes	pMMR	R	None	None	None	None
409	59	Female	Curettage	Yes	Ia	I	G3	8323-3	MC	No	Superficial	Yes	No	Yes	Unknown	Unknown	No	No	MSS	0	None	0	Yes	pMMR	R	None	None	None	None
410	58	Female	Hysterectomy	No	II	II	G1	8380-3	EC	No	Deep	Yes	No	Yes	Unknown	Unknown	No	Yes	MSS	0	None	0	Yes	pMMR	R	None	None	None	None
411	58	Female	Curettage	Yes	IIIc	III	G3	8441-3	SC	No	Superficial	Yes	Yes	Unknown	Unknown	Unknown	Yes	No	MSS	0	None	0	Yes	pMMR	R	None	None	None	None
413	47	Female	Hysterectomy	No	Ia	I	G1	8380-3	EC	No	Superficial	No	No	Unknown	Unknown	Unknown	No	No	MSS	0	None	0	Yes	pMMR	R	None	None	None	None
414	50	Female	Curettage	No	II	II	G1	8380-3	EC	No	Superficial	Yes	No	Unknown	Yes	Unknown	Unknown	Unknown	MSS	0	None	0	Yes	pMMR	R	None	None	None	None
415	60	Female	Curettage	No	Ib	I	G2	8380-3	EC	Yes	Deep	Yes	No	Unknown	Yes	Unknown	No	Yes	MSS	0	None	0	Yes	pMMR	R	None	None	None	None
420	49	Female	Curettage	No	II	II	G1	8380-3	EC	No	Superficial	Yes	No	Yes	Unknown	Unknown	No	Yes	MSI-H	1B+2D	B/D	3	Yes	dMMR	MLH1+PMS2	None	None	None	None
422	57	Female	Curettage	No	Ia	I	G1	8380-3	EC	No	Superficial	Yes	No	Unknown	Unknown	Unknown	No	No	MSS	0	None	0	Yes	pMMR	R	None	None	None	None
##1	52	Female	Curettage	No	Ia	I	G3	8441-3	SC	No	Superficial	Yes	No	Unknown	Unknown	Unknown	Unknown	Unknown	MSS	0	None	0	Yes	pMMR	R	None	None	None	None
##5	49	Female	Hysterectomy	No	Ia	I	G2	8380-3	EC	No	Superficial	Yes	No	Unknown	Unknown	Unknown	No	Yes	MSS	0	None	0	Yes	pMMR	R	None	None	None	None
##7	48	Female	Hysterectomy	No	IIIc	III	G2	8380-3	EC	Yes	Superficial	Yes	Yes	Yes	Unknown	Unknown	No	No	MSI-H	2B+3D	B/D	5	Yes	dMMR	PMS2	None	None	None	None
##8	54	Female	Curettage	No	Ia	I	G1	8380-3	EC	No	Superficial	Yes	No	Unknown	Unknown	Unknown	Unknown	Unknown	MSS	0	None	0	Yes	pMMR	R	None	None	None	None
##10	57	Female	Hysterectomy	Yes	IVb	IV	G3	8441-3	SC	No	Superficial	No	No	Yes	Yes	Unknown	No	Yes	MSS	0	None	0	Yes	pMMR	R	None	None	None	None
##11	35	Female	Curettage	No	Ia	I	G1	8380-3	EC	No	Superficial	No	No	Unknown	Unknown	Unknown	No	No	MSS	0	None	0	Yes	pMMR	R	None	None	None	None
##12	65	Female	Curettage	No	Ia	I	G1	8380-3	EC	No	Superficial	No	No	Unknown	Unknown	Unknown	Unknown	Unknown	MSI-H	2B+2D	B/D	4	Yes	dMMR	PMS2	None	None	None	None
##14	57	Female	Curettage	No	Ia	I	G1	8380-3	EC	No	Superficial	Yes	No	Unknown	Unknown	Unknown	Unknown	Unknown	MSS	0	None	0	Yes	pMMR	R	None	None	None	None
##16	67	Female	Curettage	Yes	IIIa	III	G3	8323-3	MC	No	Superficial	Yes	No	Unknown	Unknown	Unknown	No	No	MSS	0	None	0	Yes	pMMR	R	None	None	None	None
##17	59	Female	Curettage	No	Ia	I	G1	8380-3	EC	No	Superficial	Yes	No	Unknown	Unknown	Unknown	No	No	MSS	0	None	0	Yes	pMMR	R	None	None	None	None
##18	58	Female	Hysterectomy	Yes	Ia	I	G3	8323-3	MC	No	Superficial	Yes	No	Yes	Unknown	Unknown	No	No	MSS	0	None	0	Yes	pMMR	R	None	None	None	None
##19	27	Female	Curettage	No	Ia	I	G1	8380-3	EC	No	Superficial	No	No	Unknown	Unknown	Unknown	Unknown	Unknown	MSS	0	None	0	Yes	pMMR	R	None	None	None	None
##20	53	Female	Curettage	No	IIIc	III	G1	8380-3	EC	No	Deep	Yes	No	Yes	Unknown	Unknown	No	No	MSS	0	None	0	Yes	pMMR	R	None	None	None	None
##21	40	Female	Curettage	No	Ia	I	G1	8380-3	EC	No	Superficial	No	No	Unknown	Unknown	Unknown	No	No	MSI-H	2B+3D	B/D	5	Yes	dMMR	PMS2	None	None	None	None
##23	58	Female	Curettage	No	Ia	I	G2	8380-3	EC	No	Superficial	Yes	No	Unknown	Unknown	Unknown	Unknown	Unknown	MSI-H	1B+3D	B/D	4	Yes	dMMR	PMS2	None	None	None	None
##24	46	Female	Curettage	No	Ia	I	G3	8380-3	EC	No	Superficial	Yes	No	Unknown	Unknown	Unknown	No	No	MSI-H	1B+2D	B/D	3	Yes	dMMR	MLH1+PMS2	None	None	None	None
##25	47	Female	Hysterectomy	No	II	II	G1	8380-3	EC	No	Superficial	Yes	No	Yes	Unknown	Unknown	No	Yes	MSI-H	2B+2D	B/D	4	Yes	dMMR	MSH2+MSH6	None	None	None	None
##26	56	Female	Hysterectomy	No	II	II	G2	8380-3	EC	No	Superficial	Yes	No	Yes	Unknown	Unknown	No	Yes	MSS	0	None	0	Yes	pMMR	R	None	None	None	None
##29	52	Female	Curettage	No	Ia	I	G2	8380-3	EC	No	Superficial	No	No	Unknown	Unknown	Unknown	No	Yes	MSS	0	None	0	Yes	pMMR	R	None	None	None	None
##31	54	Female	Hysterectomy	No	IIIc	III	G1	8380-3	EC	No	Deep	Yes	Yes	Yes	Unknown	Unknown	No	Yes	MSS	0	None	0	Yes	pMMR	R	None	None	None	None
##34	55	Female	Curettage	No	Ia	I	G2	8380-3	EC	No	Superficial	No	No	Unknown	Unknown	Unknown	No	No	MSS	0	None	0	Yes	pMMR	R	None	None	None	None
##35	64	Female	Curettage	No	Ia	I	G1	8380-3	EC	No	Superficial	No	No	Unknown	Unknown	Unknown	No	No	MSS	0	None	0	Yes	pMMR	R	None	None	None	None
##36	39	Female	Hysterectomy	No	II	II	G1	8380-3	EC	No	Superficial	No	No	Unknown	Unknown	Unknown	No	No	MSS	0	None	0	Yes	pMMR	R	None	None	None	None
##39	34	Female	Hysterectomy	No	Ia	I	G1	8380-3	EC	No	Superficial	Yes	No	Unknown	Unknown	Unknown	No	No	MSS	0	None	0	Yes	pMMR	R	None	None	None	None
##40	47	Female	Curettage	No	Ia	I	G1	8380-3	EC	No	Superficial	Yes	No	Unknown	Unknown	Unknown	No	No	MSS	0	None	0	Yes	pMMR	R	None	None	None	None
##41	66	Female	Curettage	No	IIIc	III	G3	8380-3	EC	No	Superficial	Yes	Yes	Unknown	Unknown	Unknown	Unknown	Unknown	MSI-H	1B+1D	B/D	2	Yes	dMMR	MLH1+PMS2	None	None	None	None
##45	51	Female	Hysterectomy	No	Ia	I	G1	8380-3	EC	No	Superficial	Yes	No	Unknown	Unknown	Unknown	No	No	MSI-H	2B+1D	B/D	3	Yes	dMMR	MLH1+PMS2	None	None	None	None
##46	39	Female	Hysterectomy	No	Ib	I	G1	8380-3	EC	Yes	Deep	No	No	Unknown	Unknown	Unknown	Unknown	Unknown	MSS	0	None	0	Yes	pMMR	R	None	None	None	None
##47	46	Female	Curettage	No	Ia	I	G1	8380-3	EC	No	Superficial	Yes	No	Unknown	Unknown	Unknown	No	Yes	MSS	0	None	0	Yes	pMMR	R	None	None	None	None
##48	71	Female	Hysterectomy	Yes	Ib	I	G3	8323-3	MC	Yes	Deep	No	No	Unknown	Unknown	Unknown	No	Yes	MSS	0	None	0	Yes	pMMR	R	None	None	None	None
##49	53	Female	Hysterectomy	Yes	Ia	I	G3	8323-3	MC	Yes	Superficial	Yes	No	Unknown	Unknown	Unknown	No	No	MSS	0	None	0	Yes	pMMR	R	None	None	None	None
##50	25	Female	Curettage	No	Ia	I	G1	8380-3	EC	No	Superficial	Yes	No	Unknown	Unknown	Unknown	No	No	MSS	0	None	0	Yes	pMMR	R	None	None	None	None
##51	49	Female	Curettage	No	Ia	I	G1	8380-3	EC	No	Superficial	Yes	No	Unknown	Unknown	Unknown	Unknown	Unknown	MSI-H	1B+2D	B/D	3	Yes	dMMR	MSH2+MSH6	None	None	None	None
##52	58	Female	Hysterectomy	No	Ia	I	G1	8380-3	EC	Yes	Superficial	Yes	No	Yes	Unknown	Unknown	No	No	MSI-H	2B+3D	B/D	5	Yes	dMMR	MLH1+PMS2	None	None	None	None
##53	81	Female	Hysterectomy	No	Ia	I	G1	8380-3	EC	No	Superficial	Yes	No	Unknown	Unknown	Unknown	Unknown	Unknown	MSS	0	None	0	Yes	pMMR	R	None	None	None	None
##55	48	Female	Curettage	Yes	Ia	I	G3	8380-3	EC	No	Superficial	Yes	No	Yes	Unknown	Unknown	No	No	MSS	0	None	0	Yes	pMMR	R	None	None	None	None
##56	53	Female	Hysterectomy	No	Ia	I	G1	8380-3	EC	No	Superficial	No	No	Unknown	Unknown	Unknown	Unknown	Unknown	MSI-H	1B+3D	B/D	4	Yes	dMMR	MLH1+PMS2	None	None	None	None
##57	43	Female	Hysterectomy	No	Ia	I	G1	8380-3	EC	No	Superficial	No	No	Unknown	Unknown	Unknown	No	No	MSS	0	None	0	Yes	pMMR	R	None	None	None	None
##58	57	Female	Hysterectomy	Yes	IIIa	III	G3	8323-3	MC	Yes	Deep	Yes	No	Yes	Unknown	Unknown	No	No	MSI-H	2B+1D	B/D	3	Yes	dMMR	MLH1+PMS2	None	None	None	None
##60	59	Female	Hysterectomy	No	Ic	I	G1	8380-3	EC	No	Superficial	No	No	Yes	Yes	Unknown	No	Yes	MSS	0	None	0	Yes	pMMR	R	None	None	None	None
##61	63	Female	Hysterectomy	No	Ia	I	G1	8380-3	EC	No	Superficial	Yes	No	Unknown	Unknown	Unknown	Unknown	Unknown	MSS	0	None	0	Yes	pMMR	R	None	None	None	None
##63	54	Female	Curettage	Yes	Ia	I	G1	8380-3	EC	No	Superficial	Yes	No	Unknown	Unknown	Unknown	No	No	MSI-H	2B+3D	B/D	5	Yes	dMMR	MLH1+PMS2	None	None	None	None
##64	66	Female	Hysterectomy	No	Ib	I	G2	8380-3	EC	No	Deep	No	No	Unknown	Unknown	Unknown	No	No	MSS	0	None	0	Yes	pMMR	R	None	None	None	None
##65	55	Female	Curettage	Yes	IIIc	III	G1	8380-3	EC	No	Superficial	Yes	Yes	Unknown	Unknown	Unknown	No	No	MSI-H	2B	B	2	Yes	dMMR	MSH2+MSH6	None	None	None	None
##66	55	Female	Hysterectomy	No	Ib	I	G1	8380-3	EC	Yes	Deep	No	No	Unknown	Unknown	Unknown	No	No	MSS	0	None	0	Yes	pMMR	R	None	None	None	None
##67	52	Female	Curettage	No	IIIc	III	G3	8980-3	CS	Yes	Deep	Yes	Yes	Unknown	Unknown	Unknown	Unknown	Unknown	MSI-H	1B+1D	B/D	2	Yes	dMMR	MLH1+PMS2	None	None	None	None
##69	40	Female	Hysterectomy	No	Ia	I	G1	8980-3	EC	No	Superficial	No	No	Unknown	Unknown	Unknown	Unknown	Unknown	MSS	0	None	0	Yes	pMMR	R	None	None	None	None
##73	61	Female	Hysterectomy	No	Ib	I	G1	8380-3	EC	Yes	Deep	No	No	Unknown	Unknown	Unknown	No	No	MSS	0	None	0	Yes	pMMR	R	None	None	None	None
##75	51	Female	Curettage	No	Ia	I	G1	8380-3	EC	No	Superficial	No	No	Unknown	Unknown	Unknown	Unknown	Unknown	MSS	0	None	0	Yes	pMMR	R	None	None	None	None
##76	58	Female	Hysterectomy	No	Ib	I	G1	8380-3	EC	Yes	Deep	No	No	Unknown	Unknown	Unknown	Unknown	Unknown	MSS	0	None	0	Yes	pMMR	R	None	None	None	None
##77	49	Female	Curettage	No	Ia	I	G1	8380-3	EC	No	Superficial	No	No	Unknown	Unknown	Unknown	No	No	MSS	0	None	0	Yes	pMMR	R	None	None	None	None
##80	54	Female	Curettage	No	Ia	I	G1	8380-3	EC	No	Superficial	Yes	No	Unknown	Unknown	Unknown	Unknown	Unknown	MSS	0	None	0	Yes	pMMR	R	None	None	None	None
##81	64	Female	Hysterectomy	Yes	Ib	I	G3	8323-3	MC	No	Deep	No	No	Unknown	Unknown	Unknown	Unknown	Unknown	MSS	0	None	0	Yes	pMMR	R	None	None	None	None
##82	45	Female	Hysterectomy	No	IVb	IV	G2	8380-3	EC	No	Deep	Yes	No	Unknown	Unknown	Unknown	Unknown	Unknown	MSI-H	2B+3D	B/D	5	Yes	dMMR	MLH1+PMS2	None	None	None	None
##83	74	Female	Hysterectomy	Yes	Ia	I	G3	8441-3	SC	No	Superficial	No	No	Unknown	Unknown	Unknown	Unknown	Unknown	MSS	0	None	0	Yes	pMMR	R	None	None	None	None
##84	51	Female	Curettage	No	Ia	I	G1	8380-3	EC	No	Superficial	No	No	Unknown	Unknown	Unknown	Unknown	Unknown	MSS	0	None	0	Yes	pMMR	R	None	None	None	None
##85	51	Female	Curettage	No	Ia	I	G2	8380-3	EC	No	Superficial	No	No	Unknown	Unknown	Unknown	Unknown	Unknown	MSI-H	1B+1D	B/D	2	Yes	dMMR	MSH2+MSH6	None	None	None	None
##86	52	Female	Hysterectomy	No	II	II	G1	8380-3	EC	No	Superficial	Yes	No	Unknown	Unknown	Unknown	Unknown	Unknown	MSS	0	None	0	Yes	pMMR	R	None	None	None	None
##87	51	Female	Hysterectomy	No	II	II	G1	8380-3	EC	No	Superficial	No	No	Unknown	Unknown	Unknown	Unknown	Unknown	MSS	0	None	0	Yes	pMMR	R	None	None	None	None
##89	60	Female	Hysterectomy	No	IIIc	III	G2	8380-3	EC	Yes	Deep	Yes	Yes	Unknown	Unknown	Unknown	Unknown	Unknown	MSS	0	None	0	Yes	pMMR	R	None	None	None	None
##90	67	Female	Hysterectomy	No	Ia	I	G3	8310-3	CC	No	Superficial	No	No	Unknown	Unknown	Unknown	Unknown	Unknown	MSS	0	None	0	Yes	pMMR	R	None	None	None	None
##91	51	Female	Hysterectomy	No	Ia	I	G1	8380-3	EC	No	Superficial	No	No	Unknown	Unknown	Unknown	Unknown	Unknown	MSS	0	None	0	Yes	pMMR	R	None	None	None	None
##93	67	Female	Hysterectomy	No	Ib	I	G3	8980-3	CS	Yes	Deep	Yes	No	Unknown	Unknown	Unknown	Unknown	Unknown	MSS	0	None	0	Yes	pMMR	R	None	None	None	None
##96	52	Female	Hysterectomy	No	Ia	I	G1	8380-3	EC	No	Superficial	No	No	Unknown	Unknown	Unknown	No	No	MSS	0	None	0	Yes	pMMR	R	None	None	None	None
##97	48	Female	Hysterectomy	Yes	IVb	IV	G3	8441-3	SC	Yes	Deep	Yes	No	Unknown	Unknown	Unknown	Unknown	Unknown	MSS	0	None	0	Yes	pMMR	R	None	None	None	None
##98	30	Female	Curettage	No	Ia	I	G1	8380-3	EC	No	Superficial	No	No	Unknown	Unknown	Unknown	Unknown	Unknown	MSS	0	None	0	Yes	pMMR	R	None	None	None	None
##99	87	Female	Hysterectomy	No	IVb	IV	G2	8380-3	EC	Yes	Deep	No	No	Unknown	Unknown	Unknown	Unknown	Unknown	MSS	0	None	0	Yes	pMMR	R	None	None	None	None
##100	47	Female	Hysterectomy	No	Ia	I	G3	8380-3	EC	Yes	Superficial	Yes	No	Unknown	Unknown	Unknown	Unknown	Unknown	MSI-H	2B+1D	B/D	3	Yes	dMMR	MLH1+PMS2	None	None	None	None
##102	54	Female	Curettage	No	Ia	I	G3	8380-3	EC	No	Superficial	Yes	No	Unknown	Unknown	Unknown	Unknown	Unknown	MSS	0	None	0	Yes	pMMR	R	None	None	None	None
##103	52	Female	Curettage	No	Ia	I	G1	8380-3	EC	No	Superficial	No	No	Unknown	Unknown	Unknown	Unknown	Unknown	MSS	0	None	0	Yes	pMMR	R	None	None	None	None
##105	64	Female	Curettage	Yes	IVb	IV	G3	8441-3	SC	No	Superficial	Yes	No	Unknown	Unknown	Unknown	Unknown	Unknown	MSS	0	None	0	Yes	pMMR	R	None	None	None	None
##106	57	Female	Curettage	No	Ib	I	G1	8380-3	EC	No	Deep	Yes	No	Unknown	Unknown	Unknown	Unknown	Unknown	MSS	0	None	0	Yes	pMMR	R	None	None	None	None
##107	53	Female	Hysterectomy	No	Ia	I	G1	8380-3	EC	No	Superficial	Yes	No	Unknown	Unknown	Unknown	Unknown	Unknown	MSS	0	None	0	Yes	pMMR	R	None	None	None	None
